# Supplementary material
Source: PubMed Central journal article supplement (PMC5029156)
Supplement: ismej2015255x1.pdf [file ismej2015255x1.pdf]

## Supplementary Information

### Materials and methods

#### *Bacterial strains*

*Alicyclophilus denitrificans* DSMZ 14773, *Geobacillus kaustophilus* DSM 7263, *Gordonia cholesterolivorans* DSMZ 45229, *Hydrogenophaga pseudoflava* DSM 1034, *Steroidobacter (Sdo.) denitrificans* DSMZ18526, *Sterolibacterium (Stl.) denitrificans* DSMZ 13999, and *Thauera terpenica* 58Eu (DSMZ 12139) were purchased from the Deutsche Sammlung für Mikroorganismen und Zellkulturen (DSMZ; Braunschweig, Germany). *Comamonas testosteroni* ATCC 11996 was obtained from the American Type Culture Collection (ATCC; Manassas, VA, USA). *Stl. denitrificans* was anaerobically grown on testosterone (Wang *et al.*, 2014), whereas *A. denitrificans* was grown with cyclohexanol under denitrifying condition as described in Jin *et al.* (2011). *T. terpenica* was anaerobically grown on acetate (16 mM) and testosterone (1 mM) in the minimal medium DSMZ Medium 1315. *G. kaustophilus* and *H. pseudoflava* were aerobically grown on nutrient agar (DSMZ Medium 1) at 55 °C and on trypticase soy broth agar (DSMZ Medium 535) at 30 °C, respectively. The other aerobic bacteria were aerobically cultured in Luria-Bertani medium.

#### *Denitrifying growth of Sdo. denitrificans with testosterone*

*Sdo. denitrificans* was grown with nitrate and testosterone (4 mM) at 28 °C in anoxic fed-batch cultures (2 l) according to published procedures (Wang *et al.*, 2013). The amounts of residual testosterone in the anoxic culture were monitored using HPLC (Wang *et al.*, 2014).

#### *Molecular biological methods*

Genomic DNA was extracted from bacterial cells by using Easy Tissue & Cell Genomic DNA Purification Kit (GeneMark). PCR reaction mixtures (50 µl) contained nuclease-free H<sub>2</sub>O, 25 µl of 2 × PCR buffer, 2 mM dNTPs, 1.2 U *Taq* polymerase (BioTherm; NatuTec GmbH), 10 pmol of each primer, and 30 ng of template DNA. The PCR products were checked using standard gel electrophoresis with the SafeView DNA Stain (GeneMark), and the amplicons were purified using GenepHlow Gel/PCR Kit (Geneaid).

#### *Assembly of Sdo. denitrificans genome*

The PCR-free paired-end and mate-pair reads of the *Sdo. denitrificans* genome were obtained using a whole-genome shotgun strategy, and the two libraries were sequenced on the IlluminaHiSeq 2000 system (Illumina). Overall, 13 336 548 reads (read length 101-bp) and 7 381 106 reads (read length 101-bp) were respectively obtained in the PCR-free paired-end and mate-pair libraries, providing a 500-fold coverage of the genome. The bacterial genome was *de novo* assembled *in silico* by using ALLPATHS-LG (Gnerre *et al.*, 2011), which resulted in 32 contigs (>1000 bp) with an *N*<sub>50</sub> length of 3 469 203 bp. The gaps were filled using Sanger sequencing of the PCR products and the bioinformatics tool GapCloser module (Luo *et al.*, 2012). The gap filling results were verified in two steps. All trimmed DNA reads were realigned to the complete genome to obtain consensus sequences. The resulting consensus sequences were confirmed using optical mapping. The genome annotation was performed using the NCBI Prokaryotic Genome Annotation Pipeline and was manually revised. Functional profile was predicted according to the COG database (updated: 2014). Metabolic pathways were reconstructed using the BlastKOALA tool (<http://www.kegg.jp/blastkoala>) of KEGG.

#### *RNA extraction and RNA-Seq sequencing of Sdo. denitrificans mRNA*

Total RNA was extracted from *Sdo. denitrificans* grown under different conditions (aerobic growth with testosterone, denitrifying growth with testosterone, and denitrifying growth with heptanoic acid). rRNA was removed from total RNA samples by using the Ribo-Zero rRNA Removal Kit (Epicentre Biotechnologies). The quality of the resulting library was assessed using the Experion RNA Analysis Kit (Bio-Rad), and only RNA samples with an integrity number between 8 and 10 were selected for further analysis. First-strand cDNA was synthesized using the purified RNA fragments as reverse-transcription templates. Second-strand

cDNA was synthesized in a reaction mixture containing Second-Strand Synthesis Buffer (New England Biolabs), dNTPs with dUTP replaced by dTTP, RNaseH, and DNA polymerase I. cDNA was purified using the Qiagen purification kit followed by performing end repair. Subsequently, the DNA samples were treated with the Uracil-Specific Excision Reagent Enzyme (New England Biolabs) to digest the antisense strand DNA, followed by a PCR reaction. The constructed sequencing libraries were sequenced as single-end reads (with a read length of 101-bp) on the IlluminaHiSeq 2000 system (Illumina). The transcriptome libraries were mapped to the coding DNA sequences of *Sdo. denitrificans* using Tophat v2.1.0 (Trapnell *et al.*, 2009). The reads per kilobase per million (RPKM) values were calculated using Cufflinks v2.2.1 (Roberts *et al.*, 2011; Trapnell *et al.*, 2010) and the expression differences between samples were calculated using Cuffdiff v2.2.1 (Trapnell *et al.*, 2013) with default settings.

#### *Purification of AtcABC from denitrifying Sdo. denitrificans*

For preparing cell extracts, 20 g of frozen *Sdo. denitrificans* cells was suspended in two volumes of 20 mM Tris-HCl buffer (pH 7.8). The cells were broken by passing the cell suspension through a French pressure cell (Thermo Fisher Scientific, USA) twice at 140 MPa. The cell lysate was fractionated by two steps of centrifugation: the first step involved a centrifugation for 20 min at  $20\,000 \times g$  to remove cell debris, unbroken cells, and residual testosterone. The supernatant was then centrifuged at  $100\,000 \times g$  for 1.5 h to separate soluble proteins from membrane-bound proteins. All steps for column chromatography were performed using an FPLC system (Ä KTA start, GE Healthcare Life Sciences) at 4 °C. The soluble proteins of *Sdo. denitrificans* were applied to a DEAE Sepharose Fast Flow column (70-ml; GE Healthcare) equilibrated with buffer A (20 mM Tris-HCl, pH 7.8). Elution was performed using buffer B (20 mM Tris-HCl and 500 mM NaCl, pH 7.8) with a gradient from 0% to 100% at a flow rate of  $3.5 \text{ ml min}^{-1}$ . Fractions showing hydratase/dehydrogenase activity were pooled and mixed with an equal volume of Tris-HCl buffer (20 mM, pH 7.8) containing 1 M ammonium sulfate. The resulting protein solution (50 mL) was applied to a Butyl Sepharose Fast Flow column (25-ml; GE Healthcare) equilibrated with buffer C (20 mM Tris-HCl and 500 mM ammonium sulfate, pH 7.8). The bound 1-testosterone hydratase/dehydrogenase was eluted by a linear gradient from 0% to 100% of buffer A at a flow rate of  $2 \text{ ml min}^{-1}$ . Active fractions were pooled and concentrated through ultrafiltration (10-kDa cutoff membrane; Vivaspin; GE Healthcare). After desalting with a PD-10 column (GE Healthcare), the active protein fraction (2 ml) was applied to a HiPrep 16/60 Sephacryl S-300 HR column (120-ml; GE Healthcare) equilibrated with buffer A containing 150 mM NaCl. Elution was performed at a flow rate of  $0.5 \text{ ml min}^{-1}$ . The dominant protein peak showing activity was concentrated to 2 ml through ultrafiltration (10-kDa cutoff membrane). Protein content was determined using a Pierce BCA protein assay kit.

#### *Enzyme assays and the characterization of AtcABC*

To determine the substrate preference of purified enzyme, assay mixtures (0.9 ml) contained 20 mM Tris-HCl (pH 7.5), 5 µg purified enzyme, 50 µM DCPIP, 125 µM substrates, and 1.25% 2-propanol. Buffers used to determine the pH optimum were 100 mM Na<sup>+</sup>-phosphate (pH 5.0, 5.5, and 6.0), 100 mM MOPS-KOH (pH 6.5 and 7.0), 100 mM Tris-HCl (pH 7.5 and 8.0), and 100 mM glycine-NaOH (pH 8.5, 9.0, 9.5 and 10.0). The apparent  $K_m$  and  $V_{max}$  values of 1-testosterone were determined by varying the substrate concentration (2~250 µM; serial 2-fold dilution) and maintaining fixed concentrations of DCPIP (100 µM) and purified enzyme ( $5 \text{ µg ml}^{-1}$ ). The apparent  $K_m$  and  $V_{max}$  values were obtained by fitting Michaelis-Menton curve to the data.

#### *Molecular weight determination of AtcABC through gel filtration chromatography*

The native molecular weight of the purified enzyme was determined using gel filtration on a TSKgel G3000SWxl HPLC column ( $7.8 \times 300 \text{ mm}$ ; TOSHO Bioscience) at a flow rate of  $0.25 \text{ ml min}^{-1}$ . The column was equilibrated with 20 mM Tris-HCl (pH 7.0) and 150 mM NaCl. For calibration, the Gel Filtration Markers Kit (Sigma) containing thyroglobulin (669 kDa), apoferritin (443 kDa), β-amylase (200 kDa), alcohol dehydrogenase (150 kDa), bovine serum albumin (66 kDa), and carbonic anhydrase (29 kDa) was

used.

### *SDS-PAGE, MS/MS analysis, and protein identification*

SDS-PAGE was performed in Bolt 4%–12% Bis-Tris Plus gels (Novex). SeeBlue Plus2 Prestained Protein Standard (3–198 kDa; Novex) was used for estimating the molecular weight of the separated proteins. The gels were stained with SimplyBlu SafeStain (Invitrogen). In-gel digestion and LC-MS/MS analysis of protein spots were performed as described in Lin *et al.* (2011). MASCOT MS/MS data searches were performed using the protein database derived from the genome sequences of *Sdo. denitrificans*.

### *Measurement of protein content and nitrate concentration*

The protein content was determined by performing a bicinchoninic acid protein assay (Pierce BCA protein assay kit; Thermo Fisher Scientific) according to manufacturer's instructions using bovine serum albumin as the standard. The nitrate content in sewage samples was determined using cadmium reduction according to manufacturer's instructions (Nitrate Reagent Kit HI93728-01, Hanna Instruments).

### *Preparation of water samples*

DHSTP water samples were centrifuged at  $1000 \times g$  at room temperature for 10 min to remove sludge and debris. The supernatants were then vacuum-filtered through a cellulose acetate membrane filter (pore size =  $0.45 \mu\text{m}$ ) before solid-phase extraction. Oasis HLB LP Extraction Cartridges (6 ml, Waters) with 0.5 g of sorbent were used to extract androgens from 5 l of water samples. Cartridges were pre-conditioned sequentially with methanol (20 ml) and deionized water (10 ml). Water samples were loaded into the cartridges at a flow rate of approximately  $5 \text{ ml min}^{-1}$ . The cartridges were washed with deionized water (10 ml) to remove residual formaldehyde and dried under vacuum. Subsequently, androgens were eluted with 12 ml of methanol, followed by 7 ml of methanol-acetone (6:1, v/v). The extracts were collected, dried, and re-dissolved in  $500 \mu\text{l}$  of methanol. The samples were centrifuged at  $13\,500 \times g$  for 5 min and the resulting supernatants were analyzed through LC-MS.

### *LC-MS analysis and steroid quantification*

A Shimadzu LC system (Shimadzu) coupled with an ABI triple quadrupole mass spectrometer was used for steroid identification and quantification as described in Sun *et al.* (2014) with a slight modification. A Kinetex C18 column ( $100 \text{ mm} \times 4.6 \text{ mm}$ ,  $2.6 \mu\text{m}$ ; Phenomenex) and a binary gradient were employed to perform chromatographic separation. The flow rate was  $0.8 \text{ ml min}^{-1}$  with the mobile phase A containing 0.1% formic acid in water, whereas the mobile phase B was 100% methanol. The sample injection volume was  $10 \mu\text{l}$ . All analytes were analyzed through positive electrospray ionization in the multiple reaction monitoring (MRM) mode. Declustering potentials, entrance potentials, collision energies, and collision cell exit potentials were optimized.

### *UPLC-MS/MS identification of androgenic metabolites in sewage*

Anoxic sewage samples (1 ml) were extracted with the same volume of ethyl acetate for three times. The extracts were pooled, solvent was evaporated, and residues were re-dissolved in  $100 \mu\text{l}$  of methanol. The ethyl acetate extractable samples were analyzed using UPLC-APCI-MS/MS as described in Wang *et al.* (2013).

### *lacZ-based yeast androgen bioassay*

Anoxic sewage samples (0.5 ml) were extracted with ethyl acetate for three times. After evaporating the solvent, the extracts were re-dissolved in the same volume of dimethyl sulfoxide (DMSO) and androgenic activity in the sewage samples was determined using a *lacZ*-based yeast androgen assay as described in Wang *et al.* (2014).

### *Illumina MiSeq sequencing of bacterial 16S rRNA amplicons*

DNA was extracted from the frozen sewage samples by using the PowerSoil DNA isolation kit (MO BIO Laboratories). The 16S amplicon library was prepared according to the Illumina 16S Metagenomic Sequencing Library Preparation Guide ([http://support.illumina.com/content/dam/illumina-support/documents/documentation/chemistry\\_documentation/16s/](http://support.illumina.com/content/dam/illumina-support/documents/documentation/chemistry_documentation/16s/))

16s-metagenomic-library-prep-guide-15044223-b.pdf) with slight modifications. Genomic sections flanking the V3-V4 region of the bacterial 16rRNA gene were amplified from 36 sewage treatments by using HiFi HotStart ReadyMix (KAPA Biosystems) through PCR (95 °C for 3 min; 25 cycles: 95 °C for 30 s, 55 °C for 30 s, 72 °C for 30 s, and 72 °C for 5 min). A primer pair flanked by the Illumina Nextera linker sequence (Forward primer: 5'-TCGTCGGCAGCGTCAGATGTGTATAAGAGACAGCCTACGGGNGGCWGCAG-3'; and Reverse primer: 5'-GTCTCGTGGGCTCGGAGATGTGTATAAGAGACAGGACTACHVGGGTATCTAATCC-3') was used. The PCR products were first separated on agarose gel and those with an expected size (approximately 445 bp) were excised from the gel and purified using GenepHlow Gel/PCR kit (Geneaid). Next, Illumina Nextera XT Index (Illumina) sequencing adapters were integrated to the ends of the amplicons through PCR (95 °C for 3 min; 8 cycles: 95 °C for 30 s, 55 °C for 30 s, 72 °C for 30 s; and 72 °C for 5 min). The final libraries were purified using AMPure XP beads (Beckman Coulter) and quantified using the Qubit dsDNA HS Assay Kit (Life Technologies). The library profiles were randomly analyzed by Agilent High Sensitivity DNA Kit on BioAnalyzer. To ensure the evenness of pooling, all 36 libraries were subjected to qPCR normalization by using KAPA Library Quantification Kits to derive molar concentration, and the final library mixture was verified through qPCR. For sequencing, the library pool was run on Illumina MiSeq V2 sequencer by using MiSeq Reagent Kit V3 for paired-end (2 × 300 bp).

### *16S rRNA gene-based taxonomic analysis*

We analyzed the sequencing data in the Illumina BaseSpace cloud service by using the BaseSpace 16S Metagenomics app (Illumina) ([http://support.illumina.com/content/dam/illumina-support/documents/documentation/software\\_documentation/basespace/16s-metagenomics-user-guide-15055860-a.pdf](http://support.illumina.com/content/dam/illumina-support/documents/documentation/software_documentation/basespace/16s-metagenomics-user-guide-15055860-a.pdf)). The reads were classified against the Illumina-curated version of May 2013 Greengenes taxonomy database by using the Ribosomal Database Project (RDP) naïve Bayesian algorithm (<http://rdp.cme.msu.edu/classifier/>).

## REFERENCES

- Besemer J, Borodovsky M. (1999). Heuristic approach to deriving models for gene finding. *Nucleic Acids Res USA* **27**: 3911-3929.
- Gnerre S, Maccallum I, Przybylski D, Ribeiro FJ, Burton JN, Walker BJ *et al.* (2011). High-quality draft assemblies of mammalian genomes from massively parallel sequence data. *Proc Natl Acad Sci USA* **108**: 1513–1518.
- Horinouchi M, Hayashi T, Kudo T. (2012). Steroid degradation in *Comamonas testosteroni*. *J Steroid Biochem Mol Biol* **129**: 4-14.
- Jin J, Straathof AJJ, Pinkse MWH, Hanefeld U. (2011). Purification, characterization, and cloning of a bifunctional molybdoenzyme with hydratase and alcohol dehydrogenase activity. *Appl Microbiol Biotechnol* **89**: 1831-1840.
- Lin YL, Wen TN, Chang ST, Chu FH. (2011). Proteomic analysis of differently cultured endemic medicinal mushroom *Antrodia cinnamomea* T.T. Chang et W.N. Chou from Taiwan. *Int J Med Mushrooms* **13**: 473-482.
- Luo R, Liu B, Xie Y, Li Z, Huang W, Yuan J *et al.* (2012). SOAPdenovo2: an empirically improved memory-efficient short-read de novo assembler. *GigaScience* **1**:18.
- Roberts A, Trapnell C, Donaghey J, Rinn JL, Pachter L. (2011). Improving RNA-Seq expression estimates by correcting for fragment bias. *Genome Biol* **12**: R22.
- Sun Q, Lv M, Hu A, Yang XY, Yu CP. (2014). Seasonal variation in the occurrence and removal of pharmaceuticals and personal care products in a wastewater treatment plant in Xiamen, China. *J Hazard Mater* **277**: 69-75.

- Trapnell C, Pachter L, Salzberg SL. (2009). TopHat: discovering splice junctions with RNA-Seq. *Bioinformatics* **25**: 1105–1111.
- Trapnell C, Williams BA, Pertea G, Mortazavi A, Kwan G, van Baren MJ *et al.* (2010). Transcript assembly and quantification by RNA-Seq reveals unannotated transcripts and isoform switching during cell differentiation. *Nat Biotechnol* **28**: 511–515.
- Trapnell C, Hendrickson DG, Sauvageau M, Goff L, Rinn JL, Pachter L. (2013). Differential analysis of gene regulation at transcript resolution with RNA-Seq. *Nature Biotech.* 31, 46–53.
- Wang PH, Leu YL, Ismail W, Tang SL, Tsai CY, Chen HJ, Kao AT, Chiang YR. (2013). The anaerobic and aerobic cleavage of the steroid core ring structure by *Steroidobacter denitrificans*. *J Lipid Res* **54**: 1493-1504.
- Wang PH, Yu CP, Lin CW, Ismail W, Wey SP, Kuo AT, Chiang YR. (2014) Anoxic androgen degradation by denitrifying *Sterolibacterium denitrificans* via the 2,3-*seco*-pathway. *Appl Environ Microbiol* **80**: 3442-3452

**Table S3** Molybdopterin-containing subunits of bacterial proteins used for constructing the phylogenetic tree in Figure 5. The most similar sequences were extracted from the NCBI database by performing a standard BLASTP search with the molybdopterin-containing subunit (AtcA) of 1-testosterone hydratase/dehydrogenase from *Sdo. denitrificans* DSMZ 18526 as a query. Bacterial proteins with experimentally confirmed functions were obtained from the UniProtKB/Swiss-Prot database by performing a standard BLASTP search with the *Sdo. denitrificans* AtcA sequence as a query.

| Designation in the tree                         | Organism                                            | Group                    | Protein / Sequence identity (%)                                                            | Database                 | Accession    |
|-------------------------------------------------|-----------------------------------------------------|--------------------------|--------------------------------------------------------------------------------------------|--------------------------|--------------|
| <i>Sdo. denitrificans</i> AtcA                  | <i>Steroidobacter denitrificans</i><br>DSMZ 18526   | $\gamma$ -proteobacteria | 1-testosterone hydratase/dehydrogenase<br>(100%)                                           | NCBI                     | CP011971     |
| <i>Stl. denitrificans</i><br>1-t hydratase/DH   | <i>Sterolibacterium denitrificans</i><br>DSMZ 13999 | $\beta$ -proteobacteria  | putative 1-testosterone<br>hydratase/dehydrogenase (59%)                                   | NCBI                     | LFZK00000000 |
| <i>Azoarcus</i><br>uncharacterized              | <i>Azoarcus toluclasticus</i>                       | $\beta$ -proteobacteria  | uncharacterized protein (58%)                                                              | NCBI                     | WP_040395723 |
| <i>Thauera</i><br>uncharacterized               | <i>Thauera terpenica</i> 58Eu                       | $\beta$ -proteobacteria  | uncharacterized protein (57%)                                                              | NCBI                     | EPZ16113     |
| <i>Alicycliphilus</i><br>Michael hydratase      | <i>Alicycliphilus denitrificans</i><br>DSMZ 14773   | $\beta$ -proteobacteria  | Michael hydratase/alcohol dehydrogenase<br>(3-hydroxycyclohexanone dehydrogenase)<br>(38%) | NCBI                     | ADV16271.1   |
| <i>Thermomicrobium</i><br>CO DH                 | <i>Thermomicrobium roseum</i> DSM<br>5159           | chloroflexi              | carbon monoxide dehydrogenase (36%)                                                        | NCBI                     | ACM04667     |
| <i>Pseudomonas</i><br>caffeine DH               | <i>Pseudomonas</i> sp. CBB1                         | $\gamma$ -proteobacteria | caffeine dehydrogenase (34.4%)                                                             | UniProtKB/<br>Swiss-Prot | D7REY3       |
| <i>Oligotropha</i><br>CO DH                     | <i>Oligotropha carboxidovorans</i><br>DSM 1227      | $\alpha$ -proteobacteria | carbon monoxide dehydrogenase (33.1%)                                                      | UniProtKB/<br>Swiss-Prot | P19919       |
| <i>Hydrogenophaga</i><br>CO DH                  | <i>Hydrogenophaga pseudoflava</i><br>DSM 1034       | $\beta$ -proteobacteria  | carbon monoxide dehydrogenase (32.7%)                                                      | UniProtKB/<br>Swiss-Prot | P19913       |
| <i>Arthrobacter</i><br>nicotine DH              | <i>Arthrobacter nicotinovorans</i>                  | actinobacteria           | 6-hydroxypseudooxynicotine<br>dehydrogenase (30.2%)                                        | UniProtKB/<br>Swiss-Prot | Q933N0       |
| <i>Thauera</i><br>4-OH-benzoyl-CoA<br>reductase | <i>Thauera aromatica</i>                            | $\beta$ -proteobacteria  | 4-hydroxybenzoyl-CoA reductase (29.0%)                                                     | UniProtKB/<br>Swiss-Prot | O33819       |
| <i>Eubacterium</i><br>nicotine DH               | <i>Eubacterium barkeri</i>                          | firmicutes               | nicotinate dehydrogenase<br>(28.4%)                                                        | UniProtKB/<br>Swiss-Prot | Q0QLF2       |
| <i>E. coli</i> K12<br>xanthine DH               | <i>Escherichia coli</i> K12                         | $\gamma$ -proteobacteria | xanthine dehydrogenase (27.9%)                                                             | UniProtKB/<br>Swiss-Prot | Q46799       |
| <i>Bacillus</i><br>xanthine DH                  | <i>Bacillus subtilis</i> 168                        | firmicutes               | xanthine dehydrogenase (27.8%)                                                             | UniProtKB/<br>Swiss-Prot | O32144       |
| <i>Desulfovibrio</i><br>CHO oxidase             | <i>Desulfovibrio gigas</i>                          | $\delta$ -proteobacteria | aldehyde oxidoreductase (25.9%)                                                            | UniProtKB/<br>Swiss-Prot | Q46509       |
| <i>E. coli</i><br>hypoxanthine oxidase          | <i>Escherichia coli</i> O157:H7                     | $\gamma$ -proteobacteria | hypoxanthine oxidase (24.8%)                                                               | UniProtKB/<br>Swiss-Prot | Q8XD64       |
| <i>E. coli</i> O157:H17<br>xanthine DH          | <i>Escherichia coli</i> O157:H7                     | $\gamma$ -proteobacteria | xanthine dehydrogenase (23.9%)                                                             | UniProtKB/<br>Swiss-Prot | P77489       |
| <i>Brevundimonas</i><br>quinoline oxidase       | <i>Brevundimonas diminuta</i>                       | $\alpha$ -proteobacteria | isoquinoline 1-oxidoreductase (23.2%)                                                      | UniProtKB/<br>Swiss-Prot | Q51698       |
| <i>Gluconacetobacter</i><br>CHO DH              | <i>Gluconacetobacter polyoxogenes</i>               | $\alpha$ -proteobacteria | aldehyde dehydrogenase (21.4%)                                                             | UniProtKB/<br>Swiss-Prot | P17201       |
| <i>Pseudomonas</i><br>nicotine DH               | <i>Pseudomonas putida</i>                           | $\gamma$ -proteobacteria | nicotinate dehydrogenase (21.0%)                                                           | UniProtKB/<br>Swiss-Prot | Q88FX8       |

**Table S4** Physical and chemical characteristics of the DHSTP influent and effluent waters sampled in June 2014. Nitrogen content and basic parameters, including temperature, pH, dissolved oxygen, BOD, and COD, were measured every two weeks. Androgen concentrations shown here are those of water samples collected on June 9, 2014.

| <b>Physical and chemical properties</b>             | <b>Influent</b> |             |             | <b>Effluent</b> |             |             |
|-----------------------------------------------------|-----------------|-------------|-------------|-----------------|-------------|-------------|
|                                                     | <b>Mean</b>     | <b>Max.</b> | <b>Min.</b> | <b>Mean</b>     | <b>Max.</b> | <b>Min.</b> |
| Temperature (°C)                                    | 24.9            | 25.0        | 24.8        | 26.3            | 26.7        | 25.9        |
| pH value                                            | 7.4             | 7.5         | 7.3         | 6.9             | 7.0         | 6.8         |
| Dissolved oxygen (mg l <sup>-1</sup> )              | 4.0             | 4.9         | 3.0         | 6.8             | 7.2         | 6.4         |
| BOD (mg l <sup>-1</sup> )                           | 87              | 89          | 84          | 11              | 12          | 10          |
| COD (mg l <sup>-1</sup> )                           | 166             | 168         | 164         | 22              | 24          | 21          |
| <b>Nitrogen content</b>                             |                 |             |             |                 |             |             |
| Ammonia nitrogen (mg l <sup>-1</sup> )              | 14.4            | 17.0        | 11.1        | 4.4             | 5.8         | 1.5         |
| Nitrate nitrogen (mg l <sup>-1</sup> )              | 0.2             | 0.4         | 0.0         | 2.3             | 5.0         | 0.1         |
| Nitrite nitrogen (mg l <sup>-1</sup> )              | 0.1             | 0.2         | 0.0         | 0.4             | 0.5         | 0.3         |
| Organic nitrogen (mg l <sup>-1</sup> )              | 14.4            | 16.2        | 11.7        | 3.8             | 4.1         | 3.5         |
| <b>Androgen content</b>                             |                 |             |             |                 |             |             |
| Testosterone (ng l <sup>-1</sup> )                  | 9738            |             |             | 31              |             |             |
| Androsta-1,4-diene-3,17-dione (ng l <sup>-1</sup> ) | 142             |             |             | 234             |             |             |
| Androsta-4-en-3,17-dione (ng l <sup>-1</sup> )      | 0               |             |             | 0               |             |             |
| Epiandrosterone (ng l <sup>-1</sup> )               | 0               |             |             | 0               |             |             |

(A)

|                                   |                                                                                                                                         |       |       |       |       |       |       |       |     |       |       |       |       |       |       |       |       |
|-----------------------------------|-----------------------------------------------------------------------------------------------------------------------------------------|-------|-------|-------|-------|-------|-------|-------|-----|-------|-------|-------|-------|-------|-------|-------|-------|
| <i>Sdo. denitrificans</i>         | ... R I D D V A L V S G S V E F I D N I S V P G M L H C A I K Y S S I ... Q F P Y I I P S G N E Y D S G E Y E A A L D K A M E I S S ... |       |       |       |       |       |       |       |     |       |       |       |       |       |       |       |       |
| <i>Stl. denitrificans</i>         | ... R V E D P S L V T G T A E F I D N V T L P G M L H A A I L R S P H ... Q F P Y T I P S G N E Y D S G N Y E A V L D K L L D M A D ... |       |       |       |       |       |       |       |     |       |       |       |       |       |       |       |       |
| <i>Thau. terpenica</i>            | ... R V E D P A L V S G T V E F I D N L S L P G M L H C A I L R S P H ... Q F P Y T V P S G N E Y D S G N Y E A V L D R V L E I A D ... |       |       |       |       |       |       |       |     |       |       |       |       |       |       |       |       |
| <i>Azo. toluclasticus</i>         | ... R I E D P A L V S G T V E F I D N L S L P G M L H C A I L R S P H ... Q F P Y T V P S G N E Y D S G N Y A G V L D R V L E L A D ... |       |       |       |       |       |       |       |     |       |       |       |       |       |       |       |       |
| <hr/>                             |                                                                                                                                         |       |       |       |       |       |       |       |     |       |       |       |       |       |       |       |       |
| <i>Ali. denitrificans</i>         | ... R V E D P R L L T G K G Y I D D D H R V A E H G P R G P A A Q P V ... E F P Y L I P T G N L Y D S G N Y E K V L A E A L R M F D ... |       |       |       |       |       |       |       |     |       |       |       |       |       |       |       |       |
| <hr/>                             |                                                                                                                                         |       |       |       |       |       |       |       |     |       |       |       |       |       |       |       |       |
|                                   | G                                                                                                                                       | S/T   | V/A   | E     | F     | I     | D     | N     | ... | S     | G     | N     | E     | Y     | D     | S     | G     |
| <i>Sdo. denitrificans</i>         | G G C                                                                                                                                   | A G C | G T T | G A G | T T C | A T C | G A C | A A T | ... | A G C | G G T | A A T | G A G | T A T | G A C | A G C | G G C |
| <i>Stl. denitrificans</i>         | G G C                                                                                                                                   | A C C | G C C | G A G | T T C | A T C | G A C | A A C | ... | A G C | G G C | A A C | G A G | T A C | G A C | A G C | G G C |
| <i>Thau. terpenica</i>            | G G C                                                                                                                                   | A C C | G T C | C A G | T T C | A T C | G A C | A A C | ... | A G C | G G C | A A T | G A A | T A C | G A C | A G C | G G C |
| <i>Azo. toluclasticus</i>         | G G C                                                                                                                                   | A C C | G T C | G A G | T T C | A T C | G A C | A A C | ... | A G C | G G C | A A C | G A A | T A C | G A C | A G C | G G C |
| <hr/>                             |                                                                                                                                         |       |       |       |       |       |       |       |     |       |       |       |       |       |       |       |       |
| 5' - GGCASCGYYSAGTTCATCGACAA - 3' | 3' - GGSTCGCCSTTRCTYATRCTGTGCGCCG - 5'                                                                                                  |       |       |       |       |       |       |       |     |       |       |       |       |       |       |       |       |
| forward-primer AtcA-f1            | reverse-primer AtcA-r1                                                                                                                  |       |       |       |       |       |       |       |     |       |       |       |       |       |       |       |       |

**Figure S1** Conserved regions in the amino acid sequences of AtcA-like proteins and the deduction of the *atcA* gene probe. (A) Comparison of the amino acid sequences of the molybdenum-binding subunit (AtcA) of 1-testosterone hydratase/dehydrogenase from *Sdo. denitrificans* DSMZ 18526 with highly similar sequences (around 60% identity) from betaproteobacteria: *Stl.*, *Sterolibacterium*; *Thau.*, *Thauera*; and *Azo.*, *Azoarcus*. Bottom row: the sequence of the molybdenum-containing subunit of the 3-hydroxycyclohexanone dehydrogenase from *Alicyclophilus* (*Ali.*) *denitrificans* DSMZ 14773. (B) Highly conserved nucleotide sequence regions of the *atcA* genes used to deduce the *atcA*-specific degenerate primers are shown in (C). Degenerate primer pair for detecting *atcA* genes. R = A + G, S = G + C, and Y = C + T.



(A)

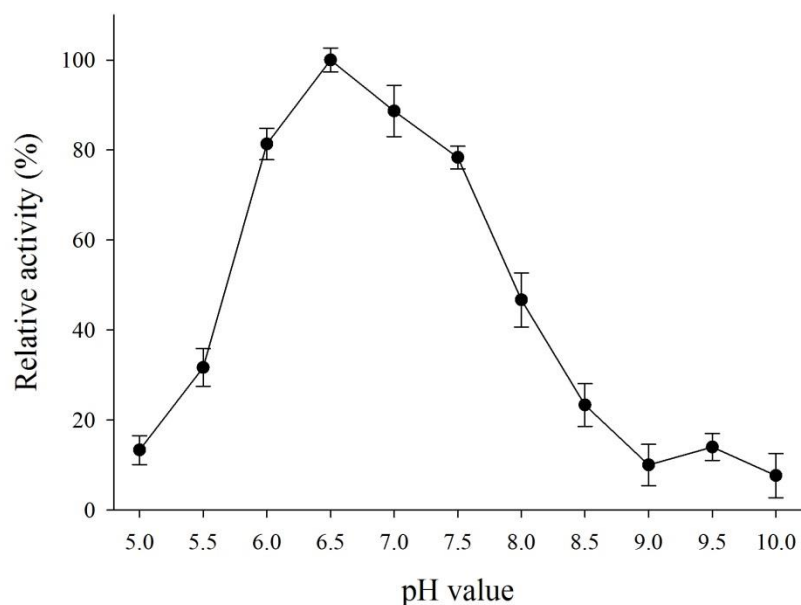

(B)

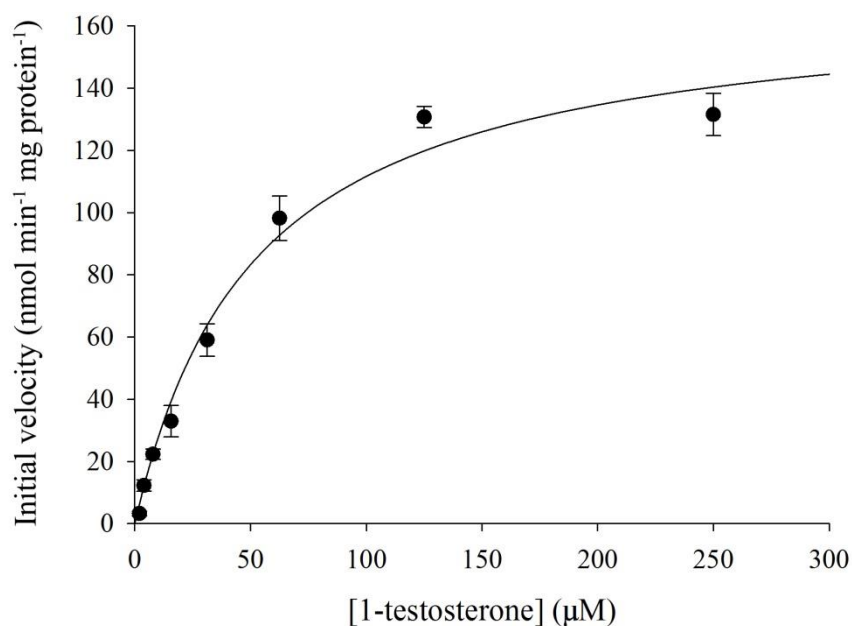

**Figure S2** (A) Effect of pH on the activity of AtcABC. The values are shown as percentages of the optimal activity at pH 6.5, taken as 100% ( $= 158 \text{ nmol min}^{-1} \text{ mg protein}^{-1}$ ). Data are means  $\pm$  S.E. of three experimental measurements. (B) Steady-state kinetic analysis of AtcABC-catalyzed hydration/dehydrogenation. The solid line represents a best fit of the Michaelis-Menten equation to the data. The fit parameters are  $K_m = 52 \pm 9 \mu\text{M}$  and  $V_{\text{max}} = 169 \pm 12 \text{ nmol min}^{-1} \text{ mg protein}^{-1}$ . The data shown are the means  $\pm$  S.E. of three experimental measurements.

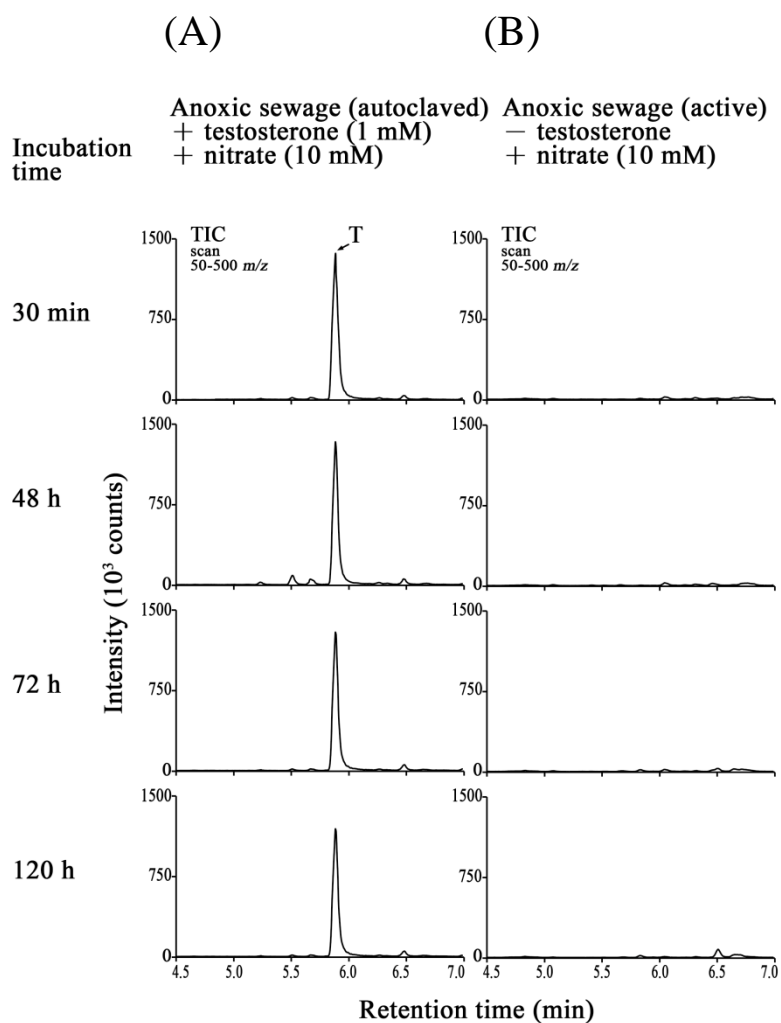

**Figure S3** UPLC-APCI-MS/MS analysis of the ethyl acetate extracts of anoxic DHSTP sewage incubated under different conditions. (A) Total ion chromatograms of autoclaved sewage incubated with testosterone and nitrate. (B) Total ion chromatograms of active sewage incubated with nitrate but without testosterone.

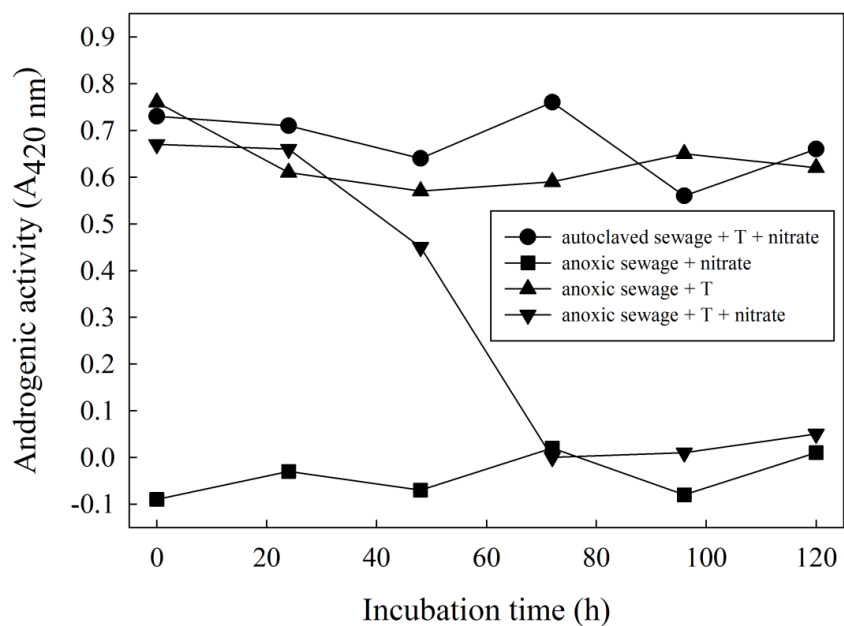

**Figure S4** Time course of androgenic activities in the negative control (autoclaved sewage incubated with testosterone and nitrate) and three treatments of anoxic DHSTP sewage. The  $A_{420}$  of the solvent, DMSO (1% v/v), was set to zero.

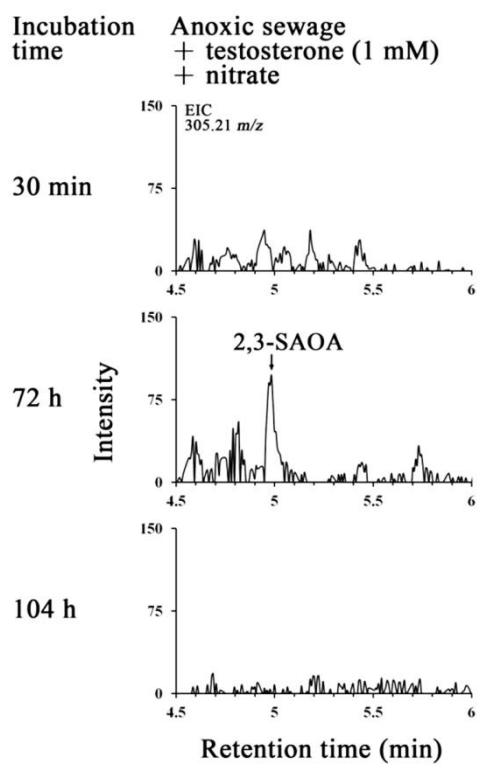

**Figure S5** The extracted ion chromatograms (*m/z* 305.21 for 2,3-SAOA) revealed the presence of the signature metabolite in the testosterone-incubated sewage. Anoxic DHSTP sewage samples collected in April 2014 were incubated with testosterone (1 mM) and nitrate (10 mM), extracted with ethyl acetate, and analyzed through UPLC-APCI-MS/MS.

(A)

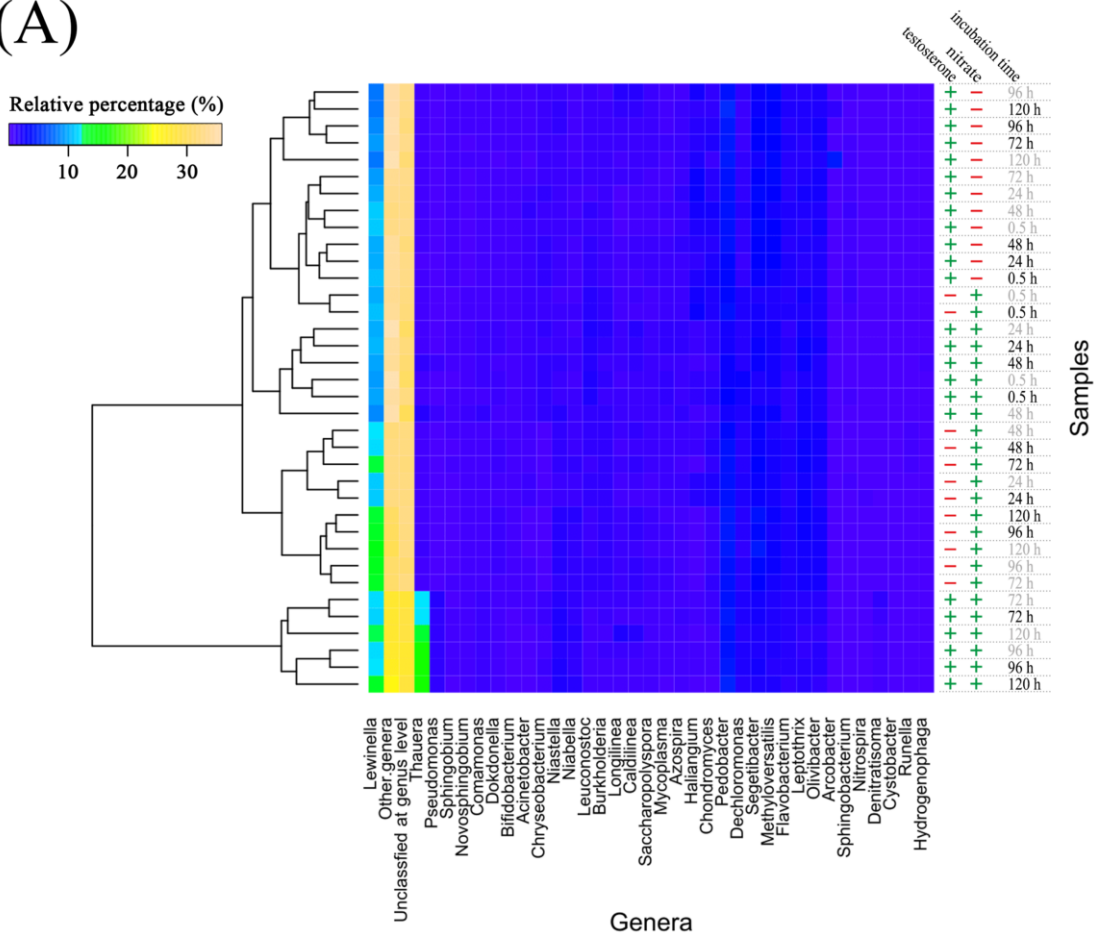

**Figure S6** The heatmap represents the relative abundances of the indicated genera within microbiota sampled from individual sewage treatments at a single time point. Sewage treatments were performed in duplicate and the individual incubation time labeled black and grey represents different replicates. Individual genera with a relative percentage of <1% are grouped as “other genera.” The dendrogram represents the average linkage hierarchical clustering of sewage samples based on the Bray-Curtis dissimilarity matrix.

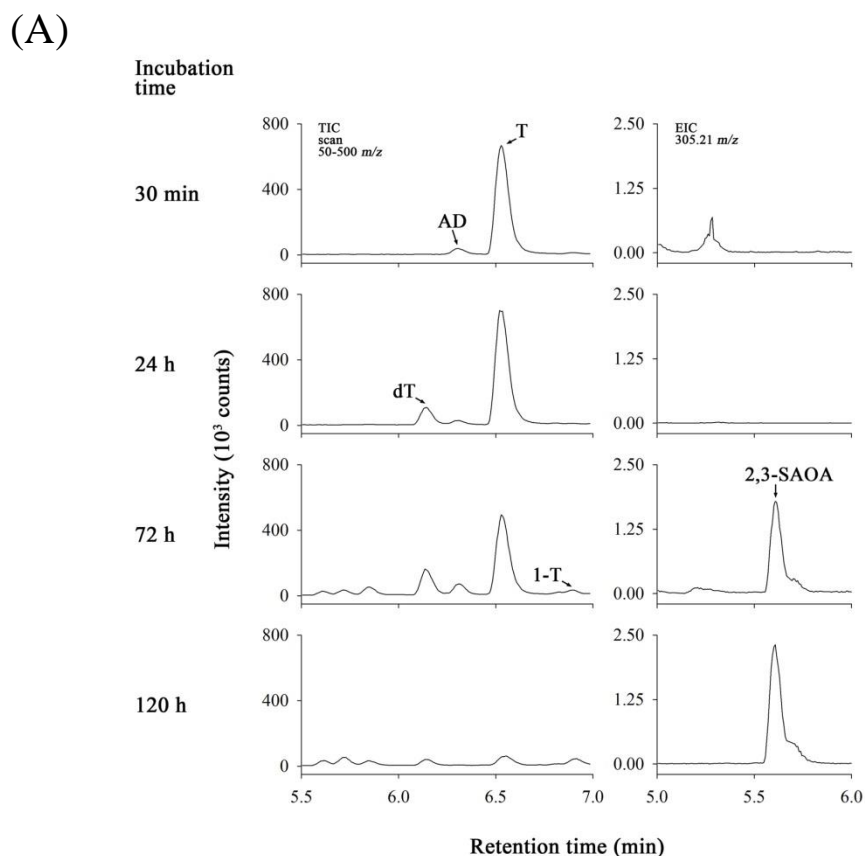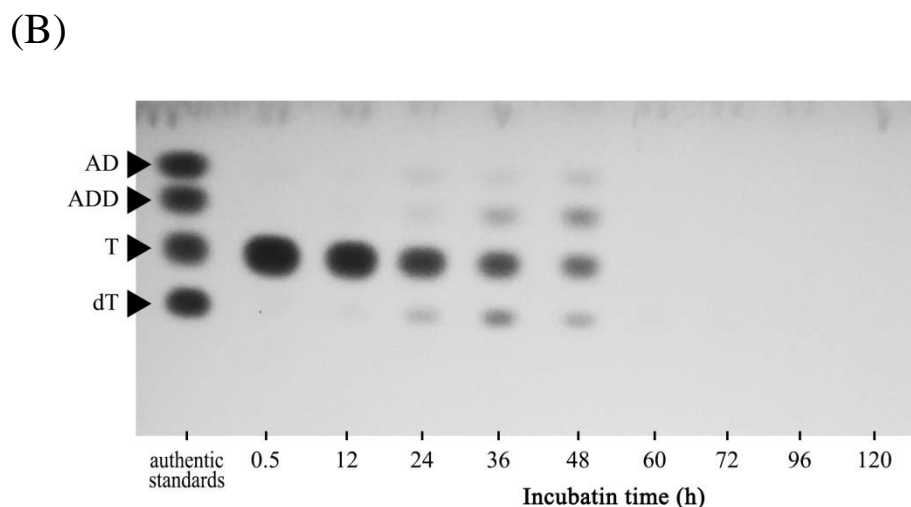

**Figure S7** The anaerobic degradation of testosterone by *Thauera terpenica* 58Eu. *T. terpenica* (200 ml) was anaerobically grown on acetate (16 mM) and testosterone (1 mM) in the minimal medium. Two independent experiments were performed. The bacterial cultures were incubated at 25 °C with stirring at 160 rpm for 6 days. Cultural samples (1 ml) were withdrawn from the bottles every 12 hours. The samples were extracted with ethyl acetate and the extracts were analyzed using UPLC-APCI-MS/MS and thin-layer chromatography (TLC). (A) Total ion chromatograms (left panel) and extracted ion chromatograms (right panel;  $m/z$  305.21 for 2,3-SAOA) revealed the anaerobic transformation of testosterone to 2,3-SAOA in a denitrifying *T. terpenica* culture. (B) TLC chromatogram indicated anaerobic degradation of testosterone in another *T. terpenica* culture. Androgen metabolites were visualized under UV light at 254 nm. See Figure 1 for the abbreviations of androgen metabolites.

**Figure S8** Twenty *atcA* sequences amplified from anoxic DHSTP sewage (incubated with testosterone and nitrate for 120 hours) by using *atcA*-specific primers AtcA-f1/AtcA-r1.

>Anoxic DHSTP *atcA*\_1

TGGCAGCGTCCAGTTCATCGACAACCTGTCCCTGCCCGGCATGCTGCACTGCGCCATCC  
TGCGCAGCCCGCACCCGCACGCCCGCATCGTGTCCGGTGGACGTCAGCGCCGCGCTGGC  
CGCCGAAGGTGTGGTGGCGGTGATCAGCGGCGAAGACGTCAAGCGCTGGTGC GCGCCC  
GGCTTCACCGCACCCGAAGGCTGGGGCAATTACTGCATGGCGGTGGACAAGGTGCGCT  
TCGTGCGCGAACC GGTCGCCGCGCTCGCCGCCACCAGCCGCTACCTGGCCGAGGACGC  
GCTCGAGTGTGCTGCACATCGAGTACGAAACCCTGACCCCGGTGTGCAACCCGGAACAG  
GCCATGGCACCCGACGCCCCCGGTGGTGTTCGAGGAGCGCGGCACCAACGTCATGCTCC  
ACCGCGACTACACCTGGGGCGAGGTGATCGCGTGTTCGCCGAGGCCGACCACATCATC  
AGCCGCCGCTTTCGCTGGAACCGCGTCGGCGCCAACCCGACCGAAACCTTCGGCTGCA  
TCTGCCAGTGGGACCTCGCCGACAACAGCCTGACCTGCCACGGCGCCTATCAGACGCC  
GCGTTTCATGGCCATCGGCCGCGCGCCTCGCTCCAACCTGCCGGCCAACCGCGTGC GCA  
TCGTACCCATCCGCAAGGCGGTGGCTTCGGTGGCAAGGGCGGCCGCGTGGCAGCGGA  
CATCGCCGCTTGTCTCTCGCGCAAGTTCGAACGGGCGGCCGGTGAAGTACATCGAAGAC  
CGCATGGAATACCTCCTCGCCGGAGGTGGGACGTCCTGGGACCGCTATTACGATGCCGC  
GCTGGCGGTGAAGGCGGACGGCACCGTGACCGGCTTTCGTGTCCATCTGGTTCGATGACC  
AGGGCGCGGCCGAGGGCTACGGCACCATCTCCGCGGCCAAGCCGCTGGCTGCCTT  
CACTGGCAACTACCGCATCGAGGCGGCTCCTACGACCTCACTCTGGTCCGCCACCAACC  
GTGCGCCACCTATCCCTACCGCGGCTATGGCCCCCACCGCACAACTGGTGTCTGAG  
TCGCTGATGGACTGCACCGCGCGAGCTGGGTATGGACCCGGCCGAGTTGCGCCGCC  
AAAACCTTCATCCGCCCCGAGCAGTTCCTACACCGTGCCGAGCGGGAACGAATATGAC

>Anoxic DHSTP *atcA*\_2

GGCACCGTCCAGTTCATCGACAACCTGTCCCTGCCCGGCATGCTGCACTGCGCCATCCT  
GCGCAGCCCGCACCCGCACGCCCGCATCGTGTCCGGTGGACGTCAGCGCCGCGCTGGCC  
GCCGAAGGTGTGGTGGCGGTGATCAGCGGCGAAGACGTCAAGCGCTGGTGC GCGCCCCG  
GCTTCACCGCACCCGAAGGCTGGGGCAATTACTGCATGGCGGTGGACAAGGTGCGCTTC  
GTCGGCGAACC GGTCGCCGCGCTCGCCGCCACCAGCCGCTACCTGGCCGAGGACGCGC  
TCGAGCTGCTGCACATCGAGTACGAAACCCTGACCCCGGTGTGCAACCCGGAACAGGC  
CATGGCACCCGACGCCCCCGGTGGTGTTCGAGGAGCGCGGCACCAACGTCATGCTCCAC  
CGCGACTACACCTGGGGCGAGGTGATCGCGTGTTCGCCGAGGCCGACCACATCATCAG  
CCGCCGCTTTCGCTGGAACCGCGTCGGCGCCAACCCGACCGAAACCTTCGGCTGCATCT  
GCCAGTGGGACCTCGCCGACAACAGCCTGACCTGCCACGGCGCCTATCAGACGCCGCG  
TTTCATGGCCATCGGCCGCGCCGCTCGCTCCAACCTGCCGGCCAACCGCGTGC GCATCG  
TCACCCATCCGCAAGGCGGTGGCTTCGGTGGCAAGGGCGGCCGCGTGGCAGCGGACAT  
CGCCGCTTGTCTCTCGCGCAAGTTCGAACGGGCGGCCGGTGAAGTACATCGAAGACCGC  
ATGGAATACCTCCTCGCCGGAGGTGGGCAGTCTGGGACCGCCATTACGATGCCGCGCT  
GGCGGTGAAGGCGGACGGCACCGTGACCGGCTTTCGTGTCCATCTGGTTCGATGACCAG  
GGCGCGGGCGCCGAGGGCTACGGCACCATCTCCGCGGCCAAGCCGCTGGCTGCCTTCA  
CTGGCAACTACCGCATCGAGGCGGCTCCTACGACCTCACTCTAGTCGCCACCAACCGT  
GCGCCACCTATCCCTACCGCGGCTATGGCCCCCACCGCACAACTGGTGTCTGAGTC  
GCTGATGGACTGCACCGCGCGAGCTGGGTATGGACCCGGCCGAGTTGCGCCGCCAA  
AACTTCATCCGCCCCGAGCAGTTCCTACACCGTGCCGAGCGGCAATGAATATGAC

>Anoxic DHSTP *atcA*\_3

ATCGACAACCTGTCCCTGCCCGGCATGTTGCACTGCGCCATCCTGCGCAGCCCGCACCC  
GCACGCCCGCATCGTGTCCGGTGGACGTCAGCGCCGCGCTGGCCGCCGAAGGCGTGGTA  
GCGGTGATCAGCGGCGAAGACGTCAAGCGCTGGTGC GTGCCGGCTTCACCGCACCCG  
AAGGCTGGGGCAATTACTGCATGGCGGTGGACAAGGTACGCTTCGTGCGCGAACC GGTC  
CGCCGCCGTCGCCGCCACCAGCCGCTACCTGGCCGAGGACGCGCTCGAGCTGCTGCAC  
ATCGAGTACGAAACCCTGACCCAGTGTGCAACCCGGAACAGGCCATGGCACCCGACG  
CCCCGGTGGTGTTCGAGGAGCGCGGCACCAACGTCATGCTCCACCGCGACTACACCTG  
GGGCGAGGTGATCGCGTGTTCGCCGAGGCCGACCACATCATCAGCCGCCGCTTTCGCT  
GGAACCGCGTCGGCGCCAACCCGACCGAAACCTTCGGCTGCATCTGCCAGTGGGACCT  
CGCCGACAACAGCCTGACCTGTCACGGCGCCTATCAGACGCCGCGCTTCATGGCCATCG

GCCGCGCCGCTCGCTCCAACCTGCCGGCCAACCGCGTGCGCATCGTCACCCATCCGCAA  
GGCGGTGGCTTCGGTGGCAAGGGCGGTCCGCGTGGCACGGACATCGCCGCCTTGCTCT  
CGCGCAAGTCGAACGGGCGGCCGGTGAAGTACATCGAAGACCGCATGGAATACCTCCT  
CGCCGGAGGTGGGCAGTCCTGGGACCGCTATTACGATGCCGCGCTGGCGGTGAAGGCG  
GACGGCACCGTGACCGGCTTTCGTGTCCACCTGGTTCGATGACCAGGGCGCGGGGCGCCG  
AGGGCTACGGCACCATCTCCGCGGCCAAGCCGCTGGCTGCCTTCACTGGCAACTACCGC  
ATCGAGGGCGGCGTCTACGACCTCACCTGGTTCGCCACCAACCGTGGCGCCACCTATCC  
CTACCGCGGCTATGGCCCCCACCGCACAACCTGGTGTCTCGAGTCGCTGATGGACTGCA  
CCGCGCGCGAGCTGGGCATGGACCCGCGCGAGTTGCGCCGCCAAAACCTTCATCCGCC  
CGAGCAGTTCCTACACCGTGCCGAGCGGGAATGAATATGAC

>Anoxic DHSTP *atcA\_4*

GGCAGCGTTCAGTTCATCGACAACCTGTCCCTGCCCGGCATGCTGCACTGTGCCATCCT  
GCGCAGCCCGCACCCGCACGCCCGCATCGTGTCCGGTGGACGTCAGCGCCGCGCTGGCC  
GCCGAAGGCGTGGTGGCGGTGATCAGCGGCGAAGACGTCAAGCGCTGGTGGCGGCCCCG  
GCTTCACCGCGCCCCGAAGGCTGGGGCAATTACTGCATGGCGGTGGACAAGGTGGCGTTC  
GTCGGCGAACCGGTTCGCCCGCGTCCGCCACCAAGCCGCTACCTGGCCGAGGACGCGC  
TCGAGCTGCTGCACATCGAGTACGAAACCCTGACCCCGGTGTGCAACCCGGAACAGGC  
CATGGCACCCGACGCCCCGGTGGTGTTCGAGGAGCGCGGCACCAACGTTCATGCTCCAC  
CGCGACTACACCTGGGGCGAGGTTCGATCGCGTGTTCGCCGAGGCCGACCATCATCAG  
CCGCCGCTTTCGCTGGAACCGCGTCCGGCGCAACCCGACCGAAACCTTCGGCTGCATCT  
GCCAGTGGGACCTCGCCGACAACAGCCTGACCTGCCACGGCGCCTATCAGACGCCGCG  
TTTCATGGCCATCGGCCGCGCCGCTCGCTCCAACCTGCCGGCCAACCGCGTGGCGCATCG  
TCACCCATCCGCAAGGCGGTGGCTTCGGTGGCAAGGGTGGCCCGCGTGGCACGGACAT  
CGCCGCCTTGTCTCGCGCAAGTCGAACGGGCGGCCGGTGAAGTACATCGAAGACCGC  
ATGGAATACCTCCTCGCCGGAGGTGGGCAGTCTTGGGACCGCTATTACGATGCCGCGCT  
GGCGGTGAAGGCGGACGGCACCGTGACCGGCTTTCGTGTCCATCTGGTTCGATGACCAG  
GGCGCGGGCGCCGAGGGCTACGGCACCATCTCCGCGGCCAAGCCGCTGGCTGCCTTCA  
CTGGCAACTACCGCATCGAGGCGGCGTCTACGACCTCACTCTGGTTCGCCACCAACCGT  
GCGCCACCTATCCTTACCGCGGCTATGGCCCCCACCGCACAACCTGGTGTCTCGAGTC  
GCTGATGGACTGTACCGCGCGCGAGCTGGGTATGGACCCGCGCGAGTTGCGCCGCCAA  
AACTTCATCCGCCCCGAGCAGTTCCTACACCGTGCCGAGCGGCAATGAATATGAC

>Anoxic DHSTP *atcA\_5*

TGGCAGCGTCGAGTTCATCGACAACCTGTCCCTGCCCGGCATGTTGCACTGCGCCATCC  
TGCGCAGCCCGCACCCGCACGCCCGCATCGTGTCCGGTGGACGTCAGCGCCGCGCTGGC  
CGCCGAAGGCGTGGTAGCGGTGATCAGCGGCGAAGACGTCAAGCGCTGGTGGCGTGCC  
GGCTTCACCGCACCCGAAGGCTGGGGCAATTACTGCATGGCGGTGGACAAGGTACGCTT  
CGTCGGCGAACCGGTTCGCCCGCGTCCGCCACCAAGCCGCTACCTGGCCGAGGACGCG  
CTCGAGCTGCTGCACATCGAGTACGAAACCCTGACCCAGTGTGCAACCCGGAACAGG  
CCATGGCGCCCGACGCCCCGGTGGTGTTCGAGGAGCGCGGCACCAACGTTCATGCTCCA  
CCGCGACTACGCCTGGGGCGAGGTTCGATCGCGTGTTCGCCGAGGCCGACCATCATCA  
GCCGCCGCTTTCGCTGGAACCGCGTCCGGCGCAACCCGACCGAAACCTTCGGCTGCATC  
TGCCAGTGGGACCTCGCCGACAACAGCCTGACCTGTCACGGCACCTATCAGACGCCGC  
GCTTCATGGCCATCGGCCGCGCCGCTCGCTCCAACCTGCCGGCCAACCGCGTGGCGATC  
GTCACCCATCCGCAAGGCGGTGGCTTCGGTGGCAAGGGCGGTCCGCGTGGCACGGACA  
TCGCCGCTTGTCTCGCGCAAGTCGAACGGGCGGCCGGTGAAGTACATCGAAGACCG  
CATGGAATACCTCCTCGCCGGAGGTGGGCAGTCTTGGGACCGCTATTACGATGCCGCGC  
TGGCGGTGAAGGCGGACGGCACCGTGACCGGCTTTCGTGTCCATCCGGTTCGATGACCA  
GGGCGCGGGCGCCGAGGGCTACGGCACCATCTCCGCGGCCAAGCCGCTGGCTGCCTTC  
ACTGGCAACTACCGCATCGAGGCGGCGTCTACGACCTCACTCTGGTTCGCCACCAACCG  
TGCGCCACCTATCCCTACCGTGGCTATGGCCCCCACCGCACAACCTGGTGTCTCGAGTC  
GCTGATGGACTGCACCGCGCGCGAGCTGGGTATGGACCCGCGCGAGTTGCGCCGCCAA  
AACTTCATCCGCCCCGAGCAGTTCCTACACCGTGCCGAGCGGGAACGAATATGAC

>Anoxic DHSTP *atcA\_6*

GGCAGCGTTCAGTTCATCGACAACCTGTCCCTGCCCGGCATGCTGCACTGTGCCATCCT  
GCGCAGCCCGCACCCGCACGCCCGCATCGTGTCCGGTGGACGTCAGCGCCGCGCTGGCC  
GCCGAAGGCGTGGTGGCGGTGATCAGCGGCGAAGACGTCAAGCGCTGGTGGCGGCCCCG



GCTTCACCGCGCCCGAAGGCTGGGGCAATTACTGCATGGCGGTGGACAAGGTGCGCTTC  
GTCGGCGAACCCGGTTCGCCGCCGTCGCCGCCACCAGCCGCTACCTGGCCGAGGACGCGC  
TCGAGCTGCTGCACATCGAGTACGAAACCCTGACCCCGGTGTGCAACCCGGAACAGGC  
CATGGCACCCGACGCCCCGGTGGTGTTCGAGGAGCGCGGCACCAACGTCATGCTCCAC  
CGGACTACACCTGGGGCGAGGTCGATCGCGTGTTCGCCGAGGCCGACCATCATCAG  
CCGCCGCTTTCGCTGGAACCGCGTCGGCGCCAACCCGACCGAAACCTTCGGCTGCATCT  
GCCAGTGGGACCTCGCCGACAACAGCCTGACCTGCCACGGCGCCTATCAGACGCCGCG  
TTTCATGGCCATCGGCCGCGCCGCCCTCGCTCCAACCTGCCGGCCAACCGCGTGCATCG  
TCACCCATCCGCAAGGCGGTGGCTTCGGTGGCAAGGGTGGCCC GCGTGGCACGGACAT  
CGCCGCCTTGTCTCGCGCAAGTTCGAACGGGCGGCCGGTGAAGTACATCGAAGACCGC  
ATGGAATACCTCCTCGCCGGAGGTGGGCAGTCTTGGGACCGCTATTACGATGCCGCGCT  
GGCGGTGAAGGCGGACGGCACCCGTGACCCGGCTTTCGTGTCCATCTGGTTCGATGACCAG  
GGCGCGGGCGCCGAGGGTACGGCACCATCTCCGCGGCCAAGCCGCTGGCTGCCTTCA  
CTGGCAACTACCGCATCGAGGCGGCGTCTACGACCTCACTCTGGTCGCCACCAACCGT  
GCGCCACCTATCCCTACCGCGGCTATGGCCCCCACC GCACAACCTGGTGTCTCGAGTC  
GCTGATGGACTGTACCGCGCGCGAGCTGGGTATGGACCCGGCCGAGTTGCGCCGCCAA  
AACTTCATCCGCCCCGAGCAGTTCCCCTACACCGTGCCGAGCGGGAACGAATATGACA

>Anoxic DHSTP *atcA\_7*

GGCACCGCTGAGTTCATCGACAACCTGTCCCTGCCCGGCATGCTGCACTGTGCCATCCT  
GCGCAGCCCGCACCCGCACGCCCGCATCGTGTCCGGTGGACGTCAGCGCCGCGCTGGCC  
GCCGAAGGCGTGGTGGCGGTGATCAGCGGCGAAGACGTCAAGCGCTGGTGC GCGCCCCG  
GCTTCACCGCGCCCGAAGGCTGGGGCAATTACTGCATGGCGGTGGACAAGGTGCGCTTC  
GTCGGCGAACCCGGTTCGCCGCCGTCGCCGCCACCAGCCGCTACCTGGCCGAGGACGCGC  
TCGAGCTGCTGCACATCGAGTACGAAACCCTGACCCCGGTGTGCAACCCGGAACAGGC  
CATGGCACCCGACGCCCCGGTGGTGTTCGAGGAGCGCGGCACCAACGTCATGCTCCAC  
CGGACTACACCTGGGGCGAGGTCGATCGCGTGTTCGCCGAGGCCGACCATCATCAG  
CCGCCGCTTTCGCTGGAACCGCGTCGGCGCCAACCCGACCGAAACCTTCGGCTGCATCT  
GCCAGTGGGACCTCGCCGACAACAGCCTGACCTGCCACGGCGCCTATCAGACGCCGCG  
TTTCACGGCCATCGGCCGCGCCGCCCTCGCTCCAACCTGCCGGCCAACCGCGTGCATCG  
TCACCCATCCGCAAGGCGGTGGCTTCGGTGGCAAGGGTGGCCC GCGTGGCACGGACAT  
CGCCGCCTGGCTCTCGCGCAAGTTCGAACGGGCGGCCGGTGAAGTACATCGAAGACCGC  
ATGGAATACCTCCTCGCCGGAGGTGGGCAGTCTTGGGACCGCTATTACGATGCCGCGCT  
GGCGGTGAAGGCGGACGGCACCCGTGACCCGGCTTTCGTGTCCATCTGGTTCGATGACCAG  
GGCGCGGGCGCCGAGGGTACGGCACCATCTCCGCGGCCAAGCCGCTGGCTGCCTTCA  
CTGGCAACTACCGCATCGAGGCGGCGTCTACGACCTCACTCTGGTCGCCACCAACCGT  
GCGCCACCTATCCCTACCGCGGCTATGGCCCCCACC GCACAACCTGGTGTCTCGAGTC  
GCTGATGGACTGTACCGCGCGCGAGCTGGGTATGGACCCGGCCGAGTTGCGCCGCCAA  
AACTTCATCCGCCCCGAGCAGTTCCCCTACACCGTGCCGAGCGGGAATGAGTATGACAG

>Anoxic DHSTP *atcA\_8*

GCACCGTTCAGTTCATCGACAACCTGTCCCTGCCCGGCATGTTGCACTGCGCCATCCTGC  
GCAGCCCGCACCCGCACGCCCGCATCGTGTCCGATGGACGTCAGCGCCGCGCTGGCCGC  
CGAAGGCGTGGTAGCGGTGATCAGCGGCGAAGACGTCAAGCGCTGGTGC GCTGCCCGGC  
TTCACCGCACCCGAAGGCTGGGGCAATTACTGCATGGCGGTGGACAAGGTACGCTTCGT  
CGGCGAACCCGGTTCGCCGCCGTCGCCGCCACCAGCCGCTACCTGGCCGAGGACGCGCTC  
GAGCTGCTGCACATCGAGTACGAAACCCTGACCCAGTGTGCAACCCGGAACAGGCCA  
TGGCACCCGACGCCCCGGTGGTGTTCGAGGAGCGCGGCACCAACGTCATGCTCCACCG  
CGACTACACCTGGGGCGAGGTCGATCGCGTGTTCGCCGAGGCCGACCATCATCAGCC  
GCCGCTTTCGCTGGAACCGCGTCGGCGCCAACCCGACCGAAACCTTCGGCTGCATCTGC  
CAGTGGGACCTCGCCGACAACAGCCTGACCTGTACGGCGCCTATCAGACGCCGCGCTT  
CATGGCCATCGGCCGCGCCGCCCTCGCTCCAACCTGCCGGCCAACCGCGTGCATCGTCA  
CCCATCCGCAAGGCGGTGGCTTCGGTGGCAAGGGCGGTCCGCGTGGCACGGACATCGC  
CGCCTTGTCTCGCGCAAGTTCGAACGGGCGGCCGGTGAAGTACATCGAAGACCGCATG  
GAATACCTCCTCGCCGGAGGTGGGCAGTCTTGGGACCGCTATTACGATGCCGCGCTGGC  
GGTGAAGGCGGACGGCACCCGTGACCCGGCTTTCGTGTCCATCTGGTTCGATGACCAGGGC  
GCGGGCGCCGAGGGTACGGCACCATCTCCGCGGCCAAGCCGCTGGCTGCCTTCACTG  
GCAACTACCGCATCGAGGCGGCGTCTACGACCTCACTCTGGTCGCCACCAACCGTGC  
CCCACCTATCCCTACCGTGGCTATGGCCCCCACC GCACAACCTGGTGTCTCGAGTCGCTG

ATGGACTGCACCGCGCGAGCTGGGTATGGACCCGGCCGAGTTGCGCCGCCAAAACCT  
TCATCCGCCCCGAGCAGTTCCTTACACCGTGCCGAGCGGCAATGAATATGACAG

>Anoxic DHSTP *atcA\_9*

TGGCACCGTTCAGTTCATCGACAACCTGTCCCTGCCCGGCATGTTGCACTGCGCCATCCT  
GCGCAGCCCCGCACCCGCACGCCCGCATCGTGTCCGGTGGACGTCAGCGCCGCGCTGGCC  
GCCGAAGGCGTGGTAGCGGTGATCAGCGGCGAAGACGTCAAGCGCTGGTGCGTGCCCCG  
GCTTCACCGCACCCGAAGGCTGGGGCAATTAATGTCATGGCGGTGGACAAGGTACGCTTC  
GTCGGCGAACCAGTTCGCCGCCGTCGCCGCCACCAGCCGCTACCTGGCCGAGGACGCGC  
TCGAGCTGCTGCACATCGAGTACGAAACCCTGACCCAGTGTGCAACCCGGAACAGGC  
CATGGCACCCGACGCCCCGGTGGTGTTCGAGGAGCGCGGCACCAACGTCATGCTCCAC  
CGCGACTACACCTGGGGCGAGGTTCGATCGCGTGTTCGCCGAGGCCGACCAATCATCATCAG  
CCGCCGCTTTCGCTGGAACCGCGTCGGCGCCAACCCGACCGAAACCTTCGGCTGCATCT  
GCCAGTGGGACCTCGCCGACAACAGCCTGACCTGTCACGGCGCCTATCAGACGCCGCG  
CTTCATGGCCATCGGCCGCGCCGCCCTCGCTCCAACCTGCCGGCCAACCGCGTGCATCG  
TCACCCATCCGCAAGGCGGTGGCTTCGGTGGCAAGGGCGGTCCGCGTGGCACGGACAT  
CGCCGCCTTGTCTCGCGCAAGTTCGAACGGGCGGCCGGTGAAGTACATCGAAGACCGC  
ATGGAATACCTCCTCGCCGGAGGTGGGCAGTCTGGGACCGCTATTACGATGCCGCGCT  
GGCGGTGAAGGCGGACGGCACCCGTGACCCGGCTTTCGTGTCCACCTGGTTCGATGACCAG  
GGCGCGGGCGCCGAGGGTACGGCACCATCTCCGCGGCCAAGCCGCTGGCTGCCTTCA  
CTGGCAACTACCGCATCGAGGCGGCGTCTACGACCTCACCTGGTTCGCCACCAACCGT  
GCGCCACCTATCCCTACCGCGGCTATGGCCCCCACCGCACAACCTGGTGTCTCGAGTC  
GCTGATGGACTGCACCGCGCGAGCTGGGCATGGACCCGGCCGAGTTGCGCCGCCAA  
AACTTCATCCGCCCCGAGCAGTTCCTTACACCGTGCCGAGCGGGAATGAATATGACA

>Anoxic DHSTP *atcA\_10*

GGCAGCGTCGAGTTCATCGACAACCTGTCCCTGCCCGGCATGTTGCACTGCGCCATCCT  
GCGCAGCCCCGCACCCGCACGCCCGCATCGTGTCCGGTGGACGTCAGCGCCGCGCTGGCC  
GCCGAAGGCGTGGTAGCGGTGATCAGCGGCGAAGACGTCAAGCGCTGGTGCGTGCCCCG  
GCTTCACCGCACCCGAAGGCTGGGGCAATTAATGTCATGGCGGTGGACAAGGTACGCTTC  
GTCGGCGAACCAGTTCGCCGCCGTCGCCGCCACCAGCCGCTACCTGGCCGAGGACGCGC  
TCGAGCTGCTGCACATCGAGTACGAAACCCTGACCCAGTGTGCAACCCGGAACAGGC  
CATGGCACCCGACGCCCCGGTGGTGTTCGAGGAGCGCGGCACCAACGTCATGCTCCAC  
CGCGACTACACCTGGGGCGAGGTTCGATCGCGTGTTCGCCGAGGCCGACCAATCATCATCAG  
CCGCCGCTTTCGCTGGAACCGCGTCGGCGCCAACCCGACCGAAACCTTCGGCTGCATCT  
GCCAGTGGGACCTCGCCGACAACAGCCTGACCTGTCACGGCGCCTATCAGACGCCGCG  
CTTCATGGCCATCGGCCGCGCCGCCCTCGCTCCAACCTGCCGGCCAACCGCGTGCATCG  
TCACCCATCCGCAAGGCGGTGGCTTCGGTGGCAAGGGCGGTCCGCGTGGCACGGACAT  
CGCCGCCTTGTCTCGCGCAAGTTCGAACGGGCGGCCGGTGAAGTACATCGAAGACCGC  
ATGGAATACCTCCTCGCCGGAGGTGGGCAGTCTGGGACCGCTATTACGATGCCGCGCT  
GGCGGTGAAGGCGGACGGCACCCGTGACCCGGCTTTCGTGTCCACCTGGTTCGATGACCAG  
GGCGCGGGCGCCGAGGGTACGGCACCATCTCCGCGGCCAAGCCGCTGGCTGCCTTCA  
CTGGCAACTACCGCATCGAGGCGGCGTCTACGACCTCACCTGGTTCGCCACCAACCGT  
GCGCCACCTATCCCTACCGCGGCTATGGCCCCCACCGCACAACCTGGTGTCTCGAGTC  
GCTGATGGACTGCACCGCGCGAGCTGGGCATGGACCCGGCCGAGTTGCGCCGCCAA  
AACTTCATCCGCCCCGAGCAGTTCCTTACACCGTGCCGAGCGGCAACGAATATGACAG

>Anoxic DHSTP *atcA\_11*

GGCACCGTTGAGTTCATCGACAACCTGTCCCTGCCCGGCATGCTGCACTGCGCCATCCT  
GCGCAGCCCCGCACCCGCACGCCCGCATCGTGTCCGGTGGACGTCAGCGCCGCGCTGGCC  
GCCGAAGGCGTGGTAGCGGTGATCAGCGGCGAAGACGTCAAGCGCTGGTGCGCGCCCCG  
GCTTCACCGCACCCGAAGGCTGGGGCAATTAATGTCATGGCGGTGGACAAGGTGCGCTTC  
GTCGGCGAACCAGTTCGCCGCCGTCGCCGCCACCAGCCGCTACCTGGCCGAGGACGCGC  
TCGAGCTGCTGCACATCGAGTACGAAACCCTGACCCCGGTGTGCAACCCGGAACAGGC  
CATGGCACCCGACGCCCCGGTGGTGTTCGAGGAGCGCGGCACCAACGTCATGCTCCAC  
CGCGACTACACCTGGGGCGAGGTTCGATCGCGTGTTCGCCGAGGCCGACCAATCATCATCAG  
CCGCCGCTTTCGCTGGAACCGCGTCGGCGCCAACCCGACCGAAACCTTCGGCTGCATCT  
GCCAGTGGGACCTCGCGGACAACAGCCTGACCTGTCACGGCGCCTATCAGACGCCGCG  
CTTCATGGCCATCGGCCGCGCCGCCCTCGCTCCAACCTGCCGGCCAACCGCGTGCATCG

TCACCCATCCGCAAGGCGGTGGCTTCGGTGGCAAGGGCGGTCCGCGTGGCACGGACAT  
CGCCGCCTTGCTCTCGCGCAAGTCTGGCGGGCGGCCGGTGAAGTACATCGAAGACCGC  
ATGGAATACCTCCTCGCCGGAGGTGGGCAGTCTGGGACCGCTATTACGATGCCGCGCT  
GGCGGTGAAGGCGGACGGCACCGTGACCGGCTTTCGTGTCCATCTGGTTCGATGACCAG  
GGTGCGGGCGCCGAGGGCTACGGCACCATCTCCGCGGCCAAGCCGCTGGCTGCCTTCA  
CTGGCAACTACCGCATCGAGGCGGCGTCTACGACCTCACCTGGTTCGCCACCAACCGT  
GCGCCACCTATCCCTACCGCGGCTATGGCCCCCACCGCACAACCTGGTGCCTCGAGTC  
GCTGATGGACTGCACCGCGCGGAGCTGGGCATGGACCCGGCCGAGTTGCGCCGCCAA  
AACTTCATCCGCCCCGAGCAGTTCCCCTACACCGTGCCGAGCGGGAATGAGTACGAC

>Anoxic DHSTP *atcA\_12*

CAGCGCTCAGTTCATCGACAACCTGTCCCTGCCCGGCATGCTGCACTGCGCCATCCTGC  
GCAGCCCGCACCCGCACGCCCGCATCGTGTTCGGTGGACGTCAGCGCCGCGCTGGCCGC  
CGAAGGTGTGGTGGCGGTGATCAGCGGCGAAGACGTCAAGCGCTGGTGCAGCGCCCGGC  
TTCACCGCACCCGAAGGCTGGGGCAATTACTGCATGGCGGTGGACAAGGTGCGCTTCGT  
CGGCGAACCGGTTCGCCCGCGTTCGCCGCCACCAGCCGCTACCTGGCCGAGGACGCGCTC  
GAGCTGCTGCACATCGAGTACGAAACCCTGACCCCGGTGTGCAACCCGGAACAGGCCA  
TGGCACCCGACGCCCCGGTGGTGTTCGAGGAGCGCGGCACCAACGTCATGCTCCACCG  
CGACTACACCTGGGGCGAGGTTCGATCGCGTGTTCGCCGAGGCCGACCACATCATCAGCC  
GCCGCTTTCGCTGGAATCGCGTTCGGCGCCAACCCGACCGAAACCTTCGGCTGCATCTGC  
CAGTGGGACCTCGCGGACAACAGCCTGACCTGTCACGGCGCCTATCAGACGCCGCGCT  
TCATGGCCATCGGCCGCGCCGCTTCGCTCCAACCTGCCGGCCAACCGCGTGCATCGTC  
ACCCATCCGCAAGGCGGTGGCTTCGGTGGCAAGGGCGGTCCGCGTGGCACGGACATCG  
CCGCCTTGCTCTCGCGCAAGTCTGGCGGGCGGCCGGTGAAGTACATCGAAGACCGCATG  
GAATACCTCCTCGCCGGAGGTGGGCAGTCTGGGACCGCTATTACGATGCCGCGCTGGC  
GGTGAAGGCGGACGGCACCGTGACCGGCTTTCGTGTCCATCTGGTTCGATGACCAGGGT  
GCGGGCGCCGAGGGCTACGGCACCATCTCCGCGGCCAAGCCGCTGGCTGCCTTCACTG  
GCAACTACCGCATCGAGGCGGCGTCTACGACCTCACCTGGTTCGCCACCAACCGTGC  
CCCACCTATCCCTACCGCGGCTATGGCCCCCACCGCACAACCTGGTGCCTCGAGTCGCT  
GATGGACTGCACCGCGCGGAGCTGGGCATGGACCCGGCCGAGTTGCGCCGCCAAAAC  
TTCATCCGCCCCGAGCAGTTCCCCTACACCGTGCCGAGCGGCAATGAATATGAC

>Anoxic DHSTP *atcA\_13*

GCAGCGTTCAGTTCATCGACAACCTGTCCCTGCCCGGCATGTTGCACTGCGCCATCCTG  
CGCAGCCCGCACCCGCACGCCCGCATCGTGTTCGGTGGACGTCAGCGCCGCGCTGGCCG  
CCGAAGGCGTGGTAGCGGTGATCAGCGGCGAAGACGTCAAGCGCTGGTGCATGCCCGG  
CTTACCCGCACCCGAAGGCTGGGGCAATTACTGCATGGCGGTGGACAAGGTACGCTTCG  
TCGGCGAACCAGGTTCGCCCGCGTTCGCCGCCACCAGCCGCTACCTGGCCGAGGACGCGCT  
CGAGCTGCTGCACATCGAGTACGAAACCCTGACCCAGTGTGCAACCCGGAACAGGCC  
ATGGCGCCCGACGCCCCGGTGGTGTTCGAGGAGCGCGGCACCAACGTCATGCTCCACC  
GCGACTACACCTGGGGCGAGGTTCGATCGCGTGTTCGCCGAGGCCGACCACATCATCAGC  
CGCCGCTTTCGCTGGAACCGCGTTCGGCGCCAACCCGACCGAAACCTTCGGCTGCATCTG  
CCAGTGGGACCTCGTCGACAACAGCCTGACCTGTCACGGCACCTATCAGACGCCGCGCT  
TCATGGCCATCGGCCGCGCCGCTTCGCTCCAACCTGCCGGCCAACCGCGTGCATCGTC  
ACCCATCCGCAAGGCGGTGGCTTCGGTGGCAAGGGCGGTCCGCGTGGCACGGACATCG  
CCGCCTTGCTCTCGCGCAAGTTCGAACGGGCGGCCGGTGAAGTACATCGAAGACCGCAT  
GGAATACCTCCTCGCCGGAGGTGGGCAGTCTGGGACCGCTATTACGATGCCGCGCTGG  
CGGTGAAGGCGGACGGCACCGTGACCGGCTTTCGTGTCCATCTGGTTCGATGACCAGGG  
CGCGGGCGCCGAGGGCTACGGCACCATCTCCGCGGCCAAGCCGCTGGCTGCCTTCACT  
GGCAACTACCGCATCGAGGCGGCGTCTACGACCTCACTCTGGTTCGCCACCAACCGTGC  
GCCACCTATCCCTACCGTGGCTATGGCCCCCACCGCACAACCTGGTGCCTCGAGTCGCT  
GATGGACTGCACCGCGCGGAGCTGGGTATGGACCCGGCCGAGTTGCGCCGCCAAAAC  
TTCATCCGCCCCGAGCAGTTCCCCTACACCGTGCCGAGCGGCAACGAATATGAC

>Anoxic DHSTP *atcA\_14*

GGCAGCGTCCAGTTCATCGACAACCTGTCCCTGCCCGGCATGCTGCACTGTGCCATCCT  
GCGCAGCCCGCACCCGCACGCCCGCATCGTGTTCGGTGGACGTCAGCGCCGCGCTGGCC  
GCCGAAGGCGTGGTGGCGGTGATCAGCGGCGAAGACGTCAAGCGCTGGTGCAGCGCCCG  
GCTTACCCGCGCCCGAAGGCTGGGGCAATTACTGCATGGCGGTGGACAAGGTGCGCTTC

GTCGGCGAACCGGTGCGCCGCCGTCGCCGCCACCAGCCGCTACCTGGCCGAGGACGCGC  
TCGAGCTGCTGCACATCGAGTACGAAACCCTGACCCCGGTGTGCAACCCGGAACAGGC  
CATGGCACCCGACGCCCCGGTGGTGTTCGAGGAGCGCGGCACCAACGTCATGCTCCAC  
CGGACTACACCTGGGGCGAGGTTCGATCGCGTGTTCGCCGAGGCCGACCATCATCAG  
CCGCCGCTTTCGCTGGAACCGCGTCGGCGCCAACCCGACCGAAACCTTCGGCTGCATCT  
GCCAGTGGGACCTCGCCGACAACAGCCTGACCTGCCACGGCGCCTATCAGACGCCGCG  
TTTCATGGCCATCGGCCGCGCCGCCTCGCTCCAACCTGCCGGCCAACCGCGTGCATCG  
TCACCCATCCGCAAGGCGGTGGCTTCGGTGGCAAGGGTGGCCC GCGTGGCACGGACAT  
CGCCGCCTTGTCTCGCGCAAGTTCGAACGGGCGGCCGGTGAAGTACATCGAAGACCGC  
ATGGAATACCTCCTCGCCGGAGGTGGGCAGTCTTGGGACCGCTATTACGATGCCGCGCT  
GGCGGTGAAGGCGGACGGCACCGTGACCGGCTTTCGTGTCCATCTGGTTCGATGACCAG  
GGCGCGGGCGCCGAGGGTACGGCACCATCTCCGCGGCCAAGCCGCTGGCTGCCTTCA  
CTGGCAACTACCGCATCGAGGCGGCGTCTACGACCTCACTCTGGTTCGCCACCAACCGT  
GCGCCACCTATCCCTACCGCGGCTATGGCCCCCACCGCACAACCTGGTGTCTCGAGTC  
GCTGATGGACTGTACCGCGCGCGAGCTGGGTATGGACCCGGCCGAGTTGCGCCGCCAA  
AACTTCATCCGCCCCGAGCAGTTCCCCTACACCGTGCCGAGCGGGAACGAATATGAC

>Anoxic DHSTP *atcA\_15*

GGCACCGTTCGAGTTCATCGACAACCTGTCCCTGCCCGGCATGCTGCACTGTGCCATCCT  
GCGCAGCCCGCACCCGCACGCCCGCATCGTGTCCGGTGGACGTCAGCGCCGCGCTGGCC  
GCCGAAGGCGTGGTGGCGGTGATCAGCGGCGAAGACGTCAAGCGCTGGTGC GCGCCCCG  
GCTTCACCGCGCCCCGAAGGCTGGGGCAATTACTGCATGGCGGTGGACAAGGTGCGCTTC  
GTCGGCGAACC GGTCGCCGCCGTCGCCGCCACCAGCCGCTACCTGGCCGAGGACGCGC  
TCGAGCTGCTGCACATCGAGTACGAAACCCTGACCCCGGTGTGCAACCCGGAACAGGC  
CATGGCACCCGACGCCCCGGTGGTGTTCGAGGAGCGCGGCACCAACGTCATGCTCCAC  
CGGACTACACCTGGGGCGAGGTTCGATCGCGTGTTCGCCGAGGCCGACCATCATCAG  
CCGCCGCTTTCGCTGGAACCGCGTCGGCGCCAACCCGACCGAAACCTTCGGCTGCATCT  
GCCAGTGGGACCTCGCCGACAACAGCCTGACCTGCCACGGCGCCTATCAGACGCCGCG  
TTTCATGGCCATCGGCCGCGCCGCCTCGCTCCAACCTGCCGGCCAACCGCGTGCATCG  
TCACCCATCCGCAAGGCGGTGGCTTCGGTGGCAAGGGTGGCCC GCGTGGCACGGACAT  
CGCCGCCTTGTCTCGCGCAAGTTCGAACGGGCGGCCGGTGAAGTACATCGAAGACCGC  
ATGGAATACCTCCTCGCCGGAGGTGGGCAGTCTTGGGACCGCTATTACGATGCCGCGCT  
GGCGGTGAAGGCGGACGGCACCGTGACCGGCTTTCGTGTCCATCTGGTTCGATGACCAG  
GGCGCGGGCGCCGAGGGTACGGCACCATCTCCGCGGCCAAGCCGCTGGCTGCCTTCA  
CTGGCAACTACCGCATCGAGGCGGCGTCTACGACCTCACTCTGGTTCGCCACCAACCGT  
GCGCCACCTATCCCTACCGCGGCTATGGCCCCCACCGCACAACCTGGTGTCTCGAGTC  
GCTGATGGACTGTACCGCGCGCGAGCTGGGTATGGACCCGGCCGAGTTGCGCCGCCAA  
AACTTCATCCGCCCCGAGCAGTTCCCCTACACCGTGCCGAGCGGCAACGAATACGAC

>Anoxic DHSTP *atcA\_16*

GGCACCGTCCAGTTCATCGACAACCTGTCCCTGCCCGGCATGTTGCACTGCGCCATCCT  
GCGCAGCCCGCACCCGCACGCCCGCATCGTGTCCGGTGGACGTCAGCGCCGCGCTGGCC  
GCCGAAGGCGTGGTAGCGGTGATCAGCGGCGAAGACGTCAAGCGCTGGTGC GCGTCCCCG  
GCTTCACCGCACCCGAAGGCTGGGGCAATTACTGCATGGCGGTGGACAAGGTACGCTTC  
GTCGGCGAACC GGTCGCCGCCGTCGCCGCCACCAGCCGCTACCTGGCCGAGGACGCGC  
TCGAGCTGCTGCACATCGAGTACGAAACCCTGACCCAGTGTGCAACCCGGAACAGGC  
CATGGCACCCGACGCCCCGGTGGTGTTCGAGGAGCGCGGCACCAACGTCATGCTCCAC  
CGGACTACACCTGGGGCGAGGTTCGATCGCGTGTTCGCCGAGGCCGACCATCATCAG  
CCGCCGCTTTCGCTGGAACCGCGTCGGCGCCAACCCGACCGAAACCTTCGGCTGCATCT  
GCCAGTGGGACCTCGCCGACAACAGCCTGACCTGTCACGGCGCCTATCAGACGCCGCG  
CTTCATGGCCATCGGCCGCGCCGCCTCGCTCCAACCTGCCGGCCAACCGCGTGCATCG  
TCACCCATCCGCAAGGCGGTGGCTTCGGTGGCAAGGGCGGTCCGCGTGGCACGGACAT  
CGCCGCCTTGTCTCGCGCAAGTTCGAACGGGCGGCCGGTGAAGTACATCGAAGACCGC  
ATGGAATACCTCCTCGCCGGAGGTGGGCAGTCTTGGGACCGCTATTACGATGCCGCGCT  
GGCGGTGAAGGCGGACGGCACCGTGACCGGCTTTCGTGTCCACCTGGTTCGATGACCAG  
GGCGCGGGCGCCGAGGGTACGGCACCATCTCCGCGGCCAAGCCGCTGGCTGCCTTCA  
CTGGCAACTACCGCATCGAGGCGGCGTCTACGACCTCACCTGGTTCGCCACCAACCGT  
GCGCCACCTATCCCTACCGCGGCTATGGCCCCCACCGCACAACCTGGTGTCTCGAGTC  
GCTGATGGACTGCACCGCGCGCGAGCTGGGCATGGACCCGGCCGAGTTGCGCCGCCAA

AACTTCATCCGCCCCGAGCAGTTCCCCTACACCGTGCCCAGCGGGAATGAATATGAC

>Anoxic DHSTP *atcA\_17*

GCACCGTCCAGTTCATCGACAACCTGTCCCTGCCCGGCATGCTGCACTGCGCCATCCTG  
CGCAGCCCCGACCCCGCACGCCCGCATCGTGTCTGGTGGACGTCAGCGCCGCGCTGGCCG  
CCGAAGGCGTGGTGGCGGTGATCAGCGGCGAAGACGTCAAGCGCTGGTGCAGCGCCCGG  
CTTCACCGCACCCGAAGGCTGGGGCAATTAATGTCATGGCGGTGGACAAGGTGCGCTTCG  
TCGGCGAACC GGTCGCCGCCGTCGCCGCCACCAGCCGCTACCTGGCCGAGGACGCGCT  
CGAGCTGCTGCACATCGAGTACGAAACCCTGACCCCGGTGTGCAACCCGGAACAGGCC  
ATGGCACCCGACGCCCGGTGGTGTTCGAGGAGCGCGGCACCAACGTCATGCTCCACC  
GCGACTACACCTGGGGCGAGGTCGATCGCGTGTTCGCCGAGGCCGACCACATCATCAGC  
CGCCGCTTTCGCTGGAACCGCGTCGGCGCCAACCCGACCGAAACCTTCGGCTGCATCTG  
CCAGTGGGACCTCGCGGACAACAGCCTGACCTGTACGGCGCCTATCAGACGCCGCGC  
TTCATGGCCATCGGCCGCGCCGCCTCGCTCCAACCTGCCGGCCAACCGCGTGCGCATCGT  
CACCCATCCGCAAGGCGGTGGCTTCGGTGGCAAGGGCGGTCCGCGTGGCACGGACATC  
GCCGCCTTGCTCTCGCGCAAGTCTGGCGGGCGGCCGGTGAAGTACATCGAAGACCGCAT  
GGAATACCTCCTCGCCGGAGGTGGGCAGTCTGGGACCGCTATTACGATGCCGCGCTGG  
CGGTGAAGGCGGACGGCACCGTGACCGGCTTTCGTGTCCATCTGGTTCGATGACCAGGG  
TGCGGGCGCCGAGGGCTACGGCACCATCTCCGCGGCCAAGCCGCTGGCTGCCTTCACTG  
GCAACTACCGCATCGAGGCGGCGTCTACGACCTCACCTGGTCGCCACCAACCGTGCG  
CCCACCTATCCCTACCGCGGCTATGGCCCCCACCGCACAACCTGGTGCTCGAGTCGCT  
GATGGACTGCACCGCGCGCGAGCTGGGCATGGACCCGGCCGAGTTGCGCCGCCAAAAC  
TTCATCCGCCCCGAGCAGTTCCCCTACACCGTGCCCAGCGGGAATGAATATGA

>Anoxic DHSTP *atcA\_18*

GGCACCGTCCAGTTCATCGACAACCTGTCCCTGCCCGGCATGCTGCACTGCGCCATCCT  
GCGCAGCCCCGACCCCGCACGCCCGCATCGTGTCTGGTGGACGTCAGCGCCGCGCTGGCC  
GCCGAAGGTGTGGTGGCGGTGATCAGCGGCGAAGACGTCAAGCGCTGGTGCAGCGCCCG  
GCTTCACCGCACCCGAAGGCTGGGGCAATTAATGTCATGGCGGTGGACAAGGTGCGCTTC  
GTCGGCGAACC GGTCGCCGCCGTCGCCGCCACCAGCCGCTACCTGGCCGAGGACGCGC  
TCGAGCTGCTGCACATCGAGTACGAAACCCTGACCCCGGTGTGCAACCCGGAACAGGC  
CATGGCACCCGACGCCCGGTGGTGTTCGAGGAGCGCGGCACCAACGTCATGCTCCAC  
CGCGACTACACCTGGGGCGAGGTCGATCGCGTGTTCGCCGAGGCCGACCACATCATCAG  
CCGCCGCTTTCGCTGGAATCGCGTCGGCGCCAACCCGACCGAAACCTTCGGCTGCATCT  
GCCAGTGGGACCTCGCGGACAACAGCCTGACCTGTACGGCGCCTATCAGACGCCGCGC  
CTTCATGGCCATCGGCCGCGCCGCCTCGCTCCAACCTGCCGGCCAACCGCGTGCGCATCG  
TCACCCATCCGCAAGGCGGTGGCTTCGGTGGCAAGGGCGGTCCGCGTGGCACGGACAT  
CGCCGCCTTGCTCTCGCGCAAGTCTGGCGGGCGGCCGGTGAAGTACATCGAAGACCGC  
ATGGAATACCTCCTCGCCGGAGGTGGGCAGTCTGGGACCGCTATTACGATGCCGCGCT  
GGCGGTGAAGGCGGACGGCACCGTGACCGGCTTTCGTGTCCATCTGGTTCGATGACCAG  
GGCGCGGGCGCCGAGGGCTACGGCACCATCTCCGCGGCCAAGCCGCTGGCTGCCTTCA  
CTGGCAACTACCGCATCGAGGCGGCGTCTACGACCTCACTCTGGTCGCCACCAACCGT  
GCGCCACCTATCCCTACCGCGGCTATGGCCCCCACCGCACAACCTGGTGCTCGAGTC  
GCTGATGGACTGCACCGCGCGCGAGCTGGGTATGGACCCGGCCGAGTTGCGCCGCCAA  
AACTTCATCCGCCCCGAGCAGTTCCCCTACACCGTGCCCAGCGGGAACGAATATGACA

>Anoxic DHSTP *atcA\_19*

GCACCGCCGAGTTCATCGACAACCTGTCCCTGCCCGGCATGTTGCACTGCGCCATCCTG  
CGCAGCCCCGACCCCGCACGCCCGCATCGTGTCTGGTGGACGTCAGCGCCGCGCTGGCCG  
CCGAAGGCGTGGTAGCGGTGATCAGCGGCGAAGACGTCAAGCGCTGGTGCAGTGCCTCG  
CTTCACCGCACCCGAAGGCTGGGGCAATTAATGTCATGGCGGTGGACAAGGTACGCTTCG  
TCGGCGAACC GGTCGCCGCCGTCGCCGCCACCAGCCGCTACCTGGCCGAGGACGCGCT  
CGAGCTGCTGCACATCGAGTACGAAACCCTGACCCAGTGTGCAACCCGGAACAGGCC  
ATGGCACCCGACGCCCGGTGGTGTTCGAGGAGCGCGGCACCAACGTCATGCTCCACC  
GCGACTACACCTGGGGCGAGGTCGATCGCGTGTTCGCCGAGGCCGACCACATCATCAGC  
CGCCGCTTTCGCTGGAACCGCGTCGGCGCCAACCCGACCGAAACCTTCGGCTGCATCTG  
CCAGTGGGACCTCGCCGACAACAGCCTGACCTGTACGGCGCCTATCAGACGCCGCGC  
TTCATGGCCATCGGCCGCGCCGCCTCGCTCCAACCTGCCGGCCAACCGCGTGCGCATCGT  
CACCCATCCGCAAGGCGGTGGCTTCGGTGGCAAGGGCGGTCCGCGTGGCACGGACATC

GCCGCCTTGCTCTCGCGCAAGTCGAACGGGCGGCCGGTGAAGTACATCGAAGACCGCA  
TGGAATACCTCCTCGCCGGAGGTGGGCAGTCCTGGGACCGCTATTACGATGCCGCGCTG  
GCGGTGAAGGCGGACGGCACCGTGACCGGCTTTCGTGTCCACCTGGTTCGATGACCAGG  
GCGCGGGCGCCGAGGGCTACGGCACCATCTCCGCGGCCAAGCCGCTGGCTGCCTTAC  
TGGCAACTACCGCATCGAGGCGGCGTCCTACGACCTCACCTGGTTCGCCACCAACCGTG  
CGCCACCTATCCCTACCGCGGCTATGGCCCCCACCGCACAACCTGGTGTCTCGAGTCG  
CTGATGGACTGCACCGCGCGGAGCTGGGCATGGACCCGGCCGAGTTGCGCCGCCAAA  
ACTTCATCCGCCCCGAGCAGTTCCTTACACCGTGCCCAGCGGGAATGAATATGACAG

>Anoxic DHSTP *atcA\_20*

GGCACCGCCGAGTTCATCGACAACCTGTCCCTGCCCGGCATGTTGCACTGCGCCATCCT  
GCGCAGCCCGCACCCGCACGCCCGCATCGTGTCCGGTGGACGTCAGCGCCGCGCTGGCC  
GCCGAAGGCGTGGTAGCGGTGATCAGCGGCGAAGACGTCAAGCGCTGGTGCCTGCCCG  
GCTTACCGCACCCGAAGGCTGGGGCAATTACTGCATGGCGGTGGACAAGGTACGCTTC  
GTCGGCGAACCCGGTTCGCCCGCGTCCGCCACCAGCCGCTACCTGGCCGAGGACGCGC  
TCGAGCTGCTGCACATCGAGTACGAAACCCTGACCCAGTGTGCAACCCGGAACAGGC  
CATGGCACCCGACGCCCCGGTGGTGTTCGAGGAGCGCGGCACCAACGTCATGCTCCAC  
CGCGACTACACCTGGGGCGAGGTCGATCGCGTGTTCGCCGAGGCCGACCACATCATCAG  
CCGCCGCTTTCGCTGGAACCGCGTCCGGCGCCAACCCGACCGAAACCTTCGGCTGCATCT  
GCCAGTGGGACCTCGCCGACAACAGCCTGACCTGTCACGGCGCCTATCAGACGCCGCG  
CTTCATGGCCATCGGCCGCGCCGCCTCGCTCCAACCTGCCGGCCAACCGCGTGCATCG  
TCACCCATCCGCAAGGCGGTGGCTTCGGTGGCAAGGGCGGTCCGCGTGGCACGGACAT  
CGCCGCCTTGCTCTCGCGCAAGTCGAACGGGCGGCCGGTGAAGTACATCGAAGACCGC  
ATGGAATACCTCCTCGCCGGAGGTGGGCAGTCCTGGGACCGCTATTACGATGCCGCGCT  
GGCGGTGAAGGCGGACGGCACCGTGACCGGCTTTCGTGTCCACCTGGTTCGATGACCAG  
GGCGCGGGCGCCGAGGGCTACGGCACCATCTCCGCGGCCAAGCCGCTGGCTGCCTTCA  
CTGGCAACTACCGCATCGAGGCGGCGTCCTACGACCTCACCTGGTTCGCCACCAACCGT  
GCGCCACCTATCCCTACCGCGGCTATGGCCCCCACCGCACAACCTGGTGTCTCGAGTC  
GCTGATGGACTGCACCGCGCGGAGCTGGGCATGGACCCGGCCGAGTTGCGCCGCCAA  
AACTTCATCCGCCCCGAGCAGTTCCTTACACCGTGCCCAGCGGGAATGAATATGAC
